# Supplementary material for: Ligand-free Cu(ii)-catalyzed aerobic etherification of aryl halides with silanes: an experimental and theoretical approach
Source: Royal Society of Chemistry journal article supplement (doi:10.1039/c9nj01777a), 2019-01-01
Supplement: c9nj01777a1.pdf [file c9nj01777a1.pdf]

## Supporting Information For

# Ligand free Cu(II) catalyzed aerobic etherification of aryl halides with silanes: An experimental and theoretical approach

Muhammad Naeem Ahmed<sup>1\*</sup>, Khalil Ahmad<sup>2</sup>, Khawaja Ansar Yasin<sup>1</sup>, Tayyaba Farooq<sup>1</sup>, Bilal Ahmad Khan<sup>1</sup> and Soumendra K. Roy<sup>3\*</sup>

<sup>1</sup>*Department of Chemistry, The University of Azad Jammu & Kashmir Muzaffarabad 13100  
Pakistan*

<sup>2</sup>*Department of Chemistry, Mirpur University of Science and Technology (MUST), Mirpur 10250  
(AJK), Pakistan*

<sup>3</sup>*Institute of Theoretical and Computational Chemistry, Shaanxi key Laboratory of Catalysis,  
School of Chemical & Environmental Science, Shaanxi University of Technology,  
Hanzhong, Shaanxi 723001, P. R. China*

Correspondence: drnaem@ajku.edu.pk (M.N.A.); soumya029@yahoo.in (S.K.R.)

### Contents

|                                                                        |    |
|------------------------------------------------------------------------|----|
| 1. <sup>1</sup> HNMR and <sup>13</sup> CNMR spectra of compounds ----- | 2  |
| 2. Cartesian coordinates of relevant stationary points -----           | 26 |

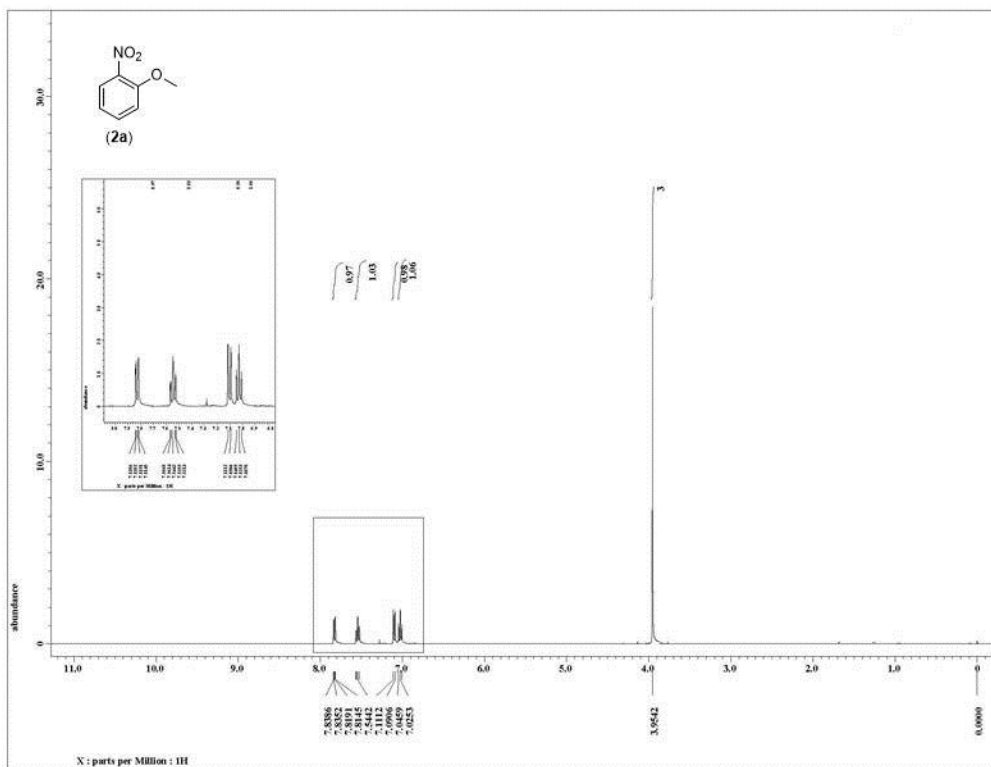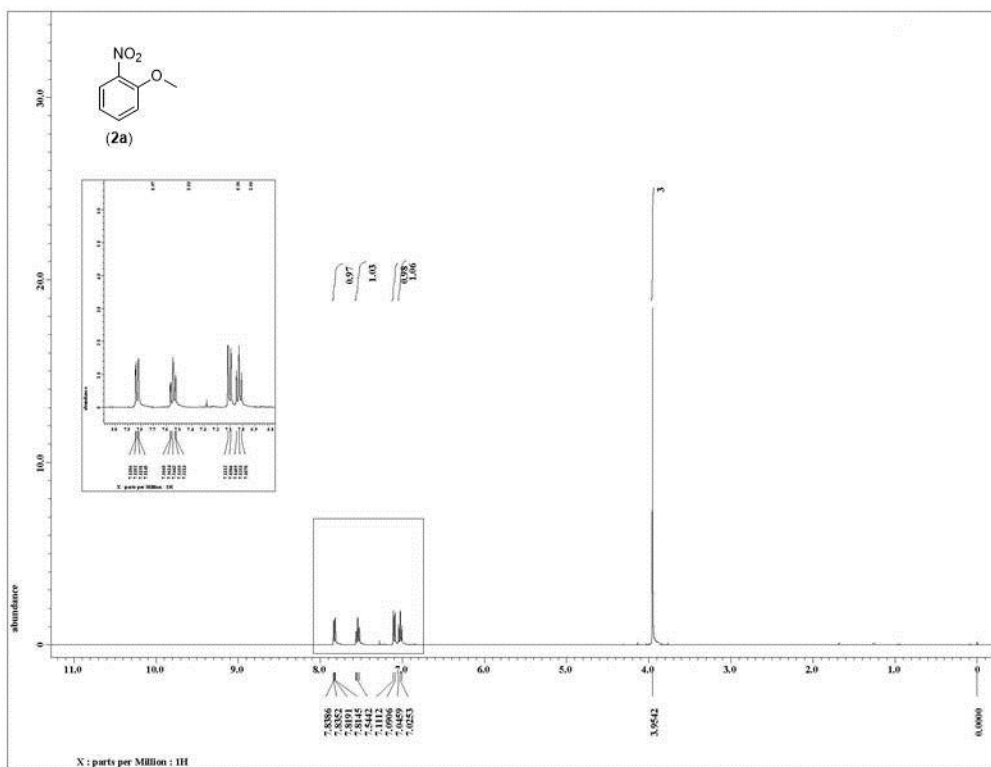

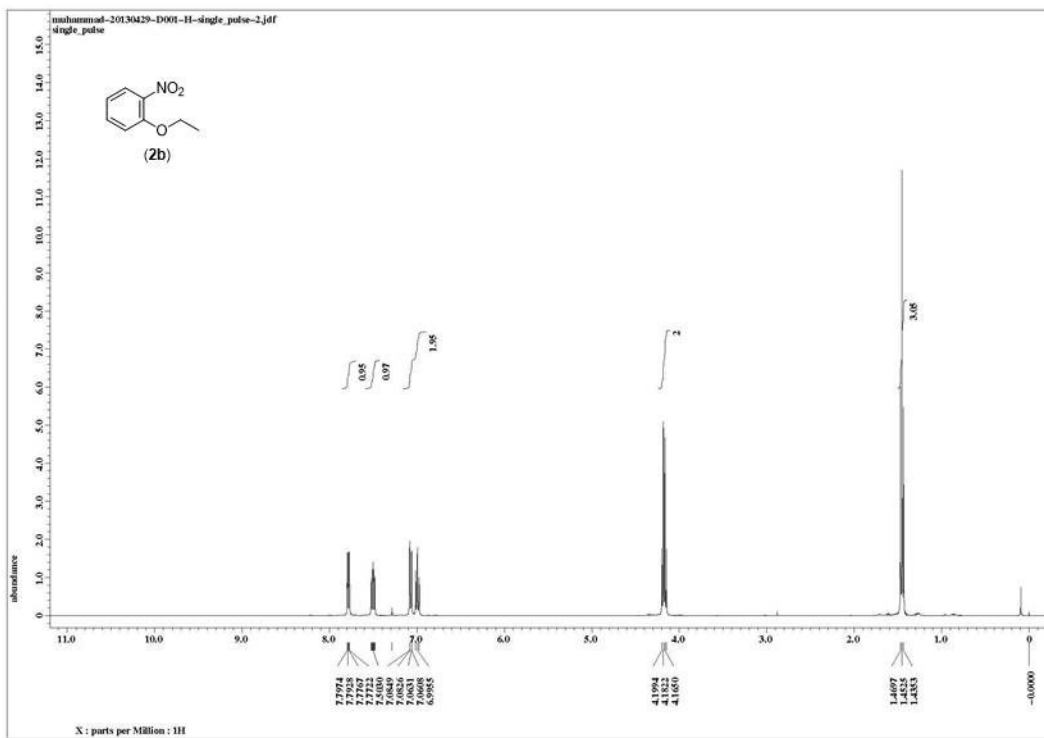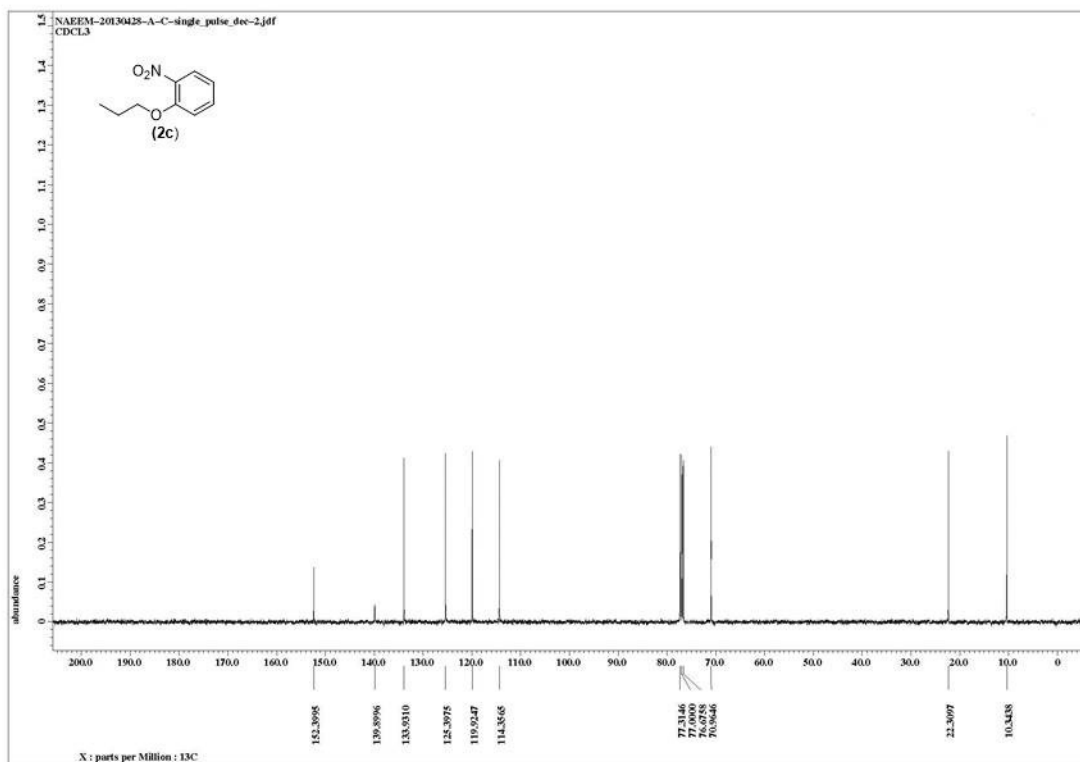

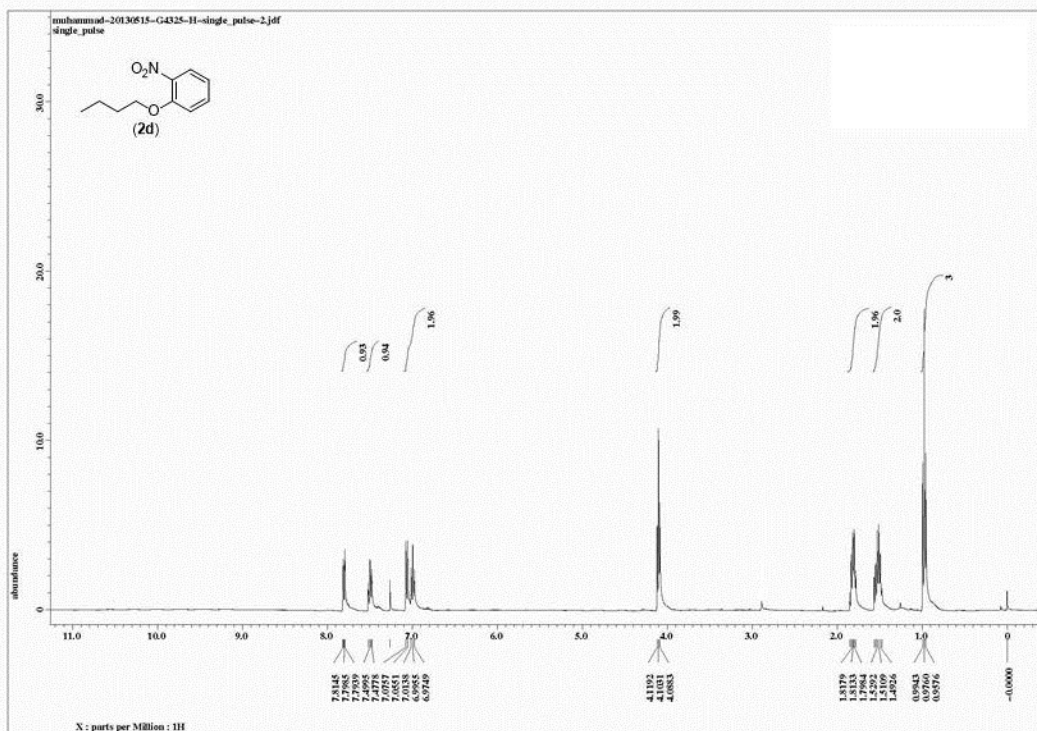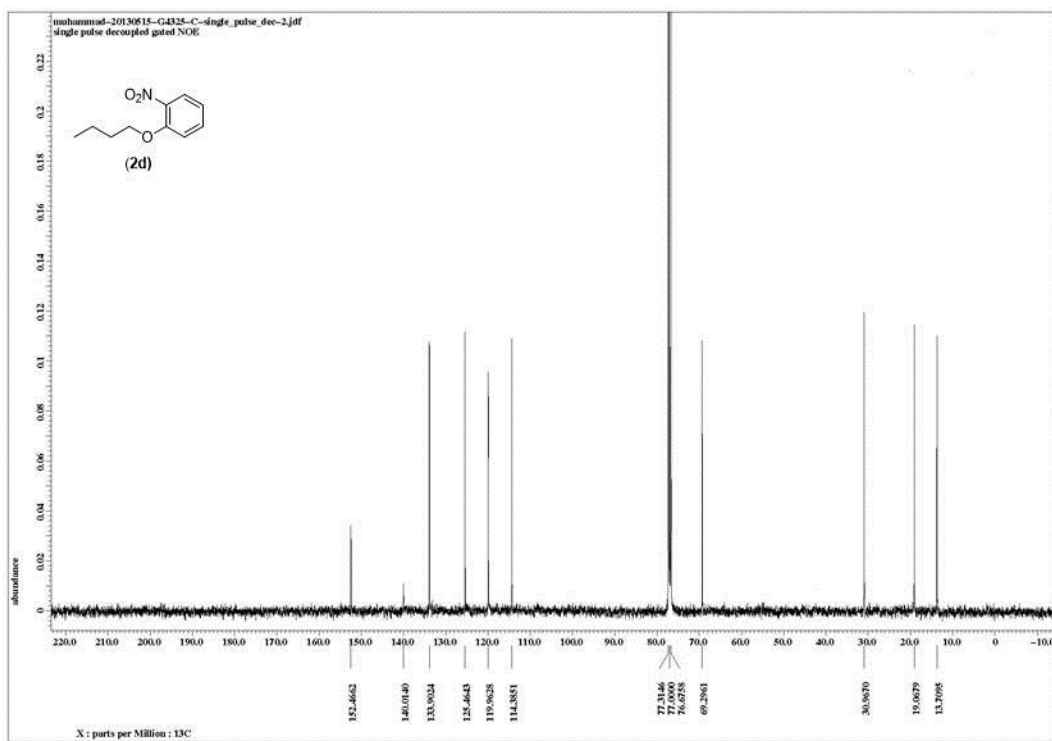

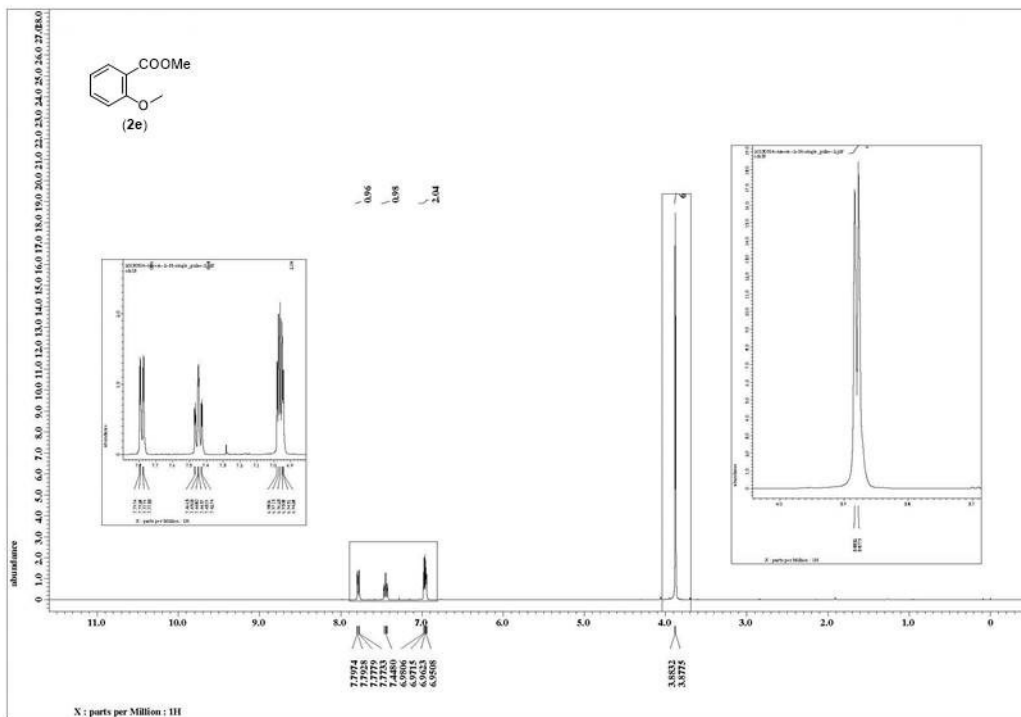

### 1) Cartesian coordinates of relevant stationary points

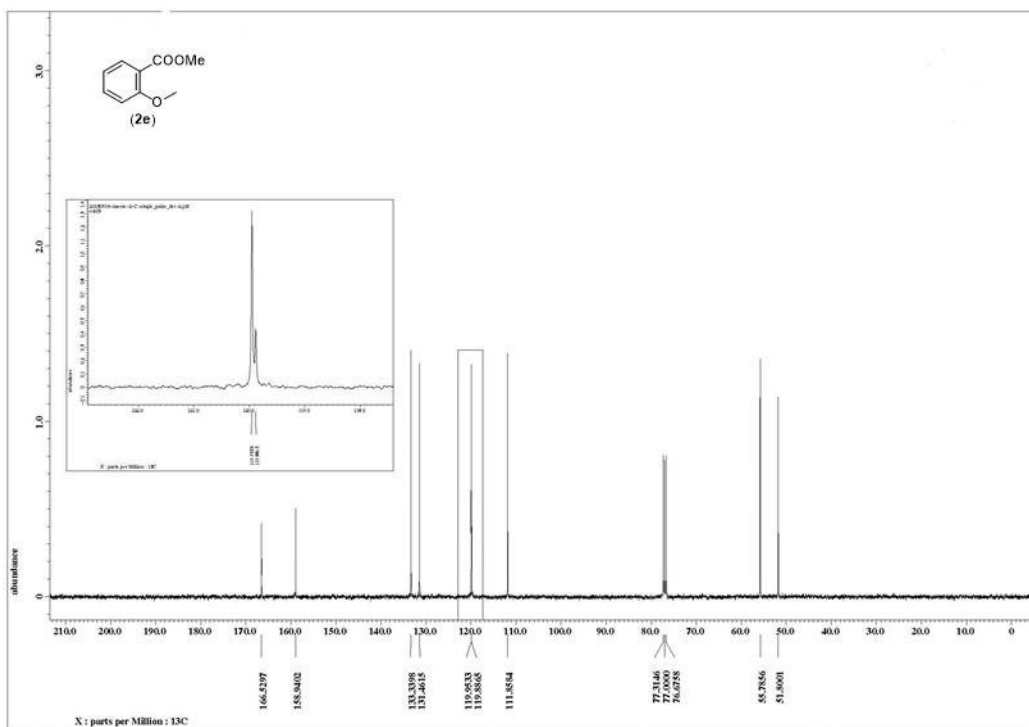

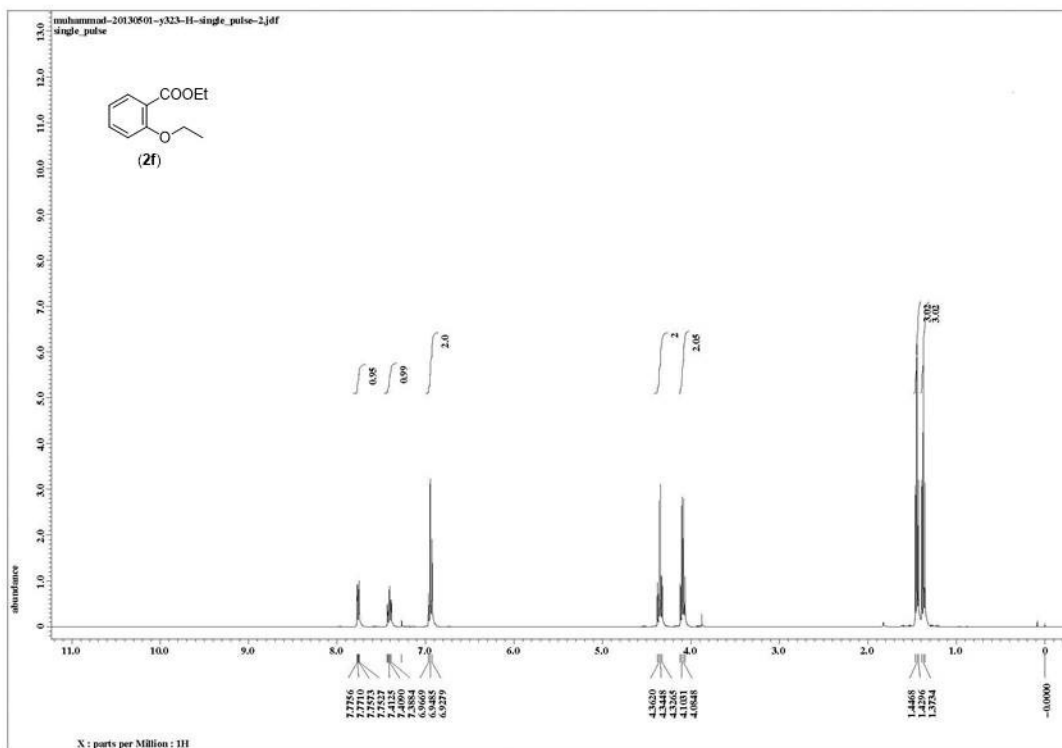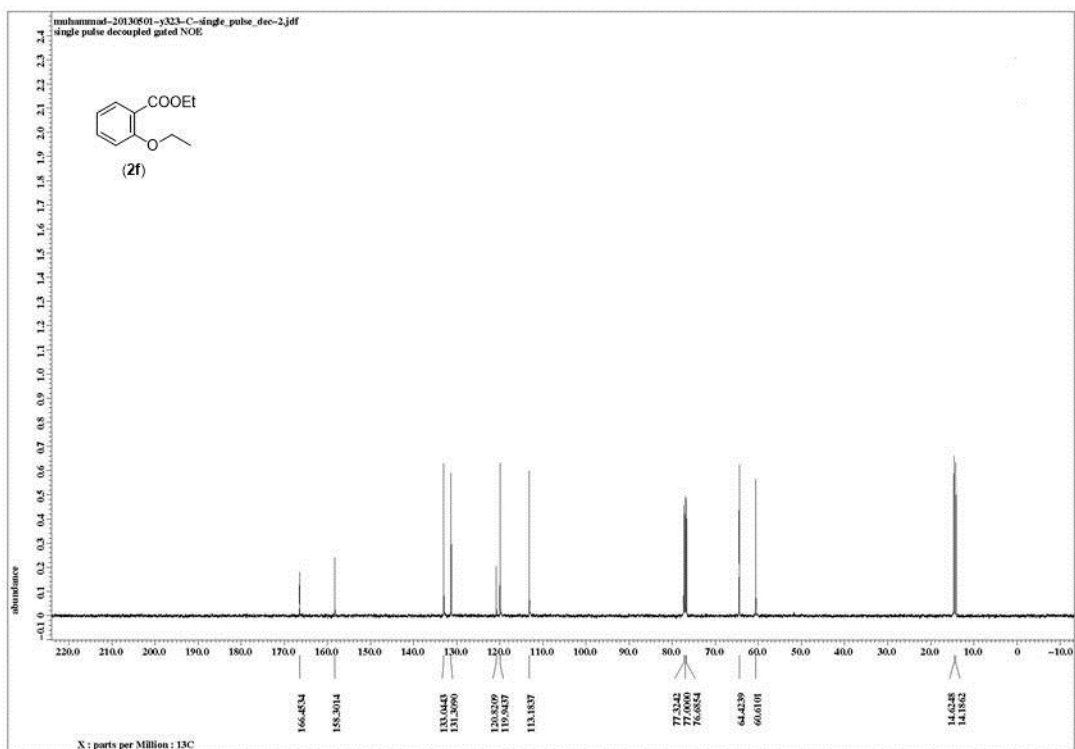

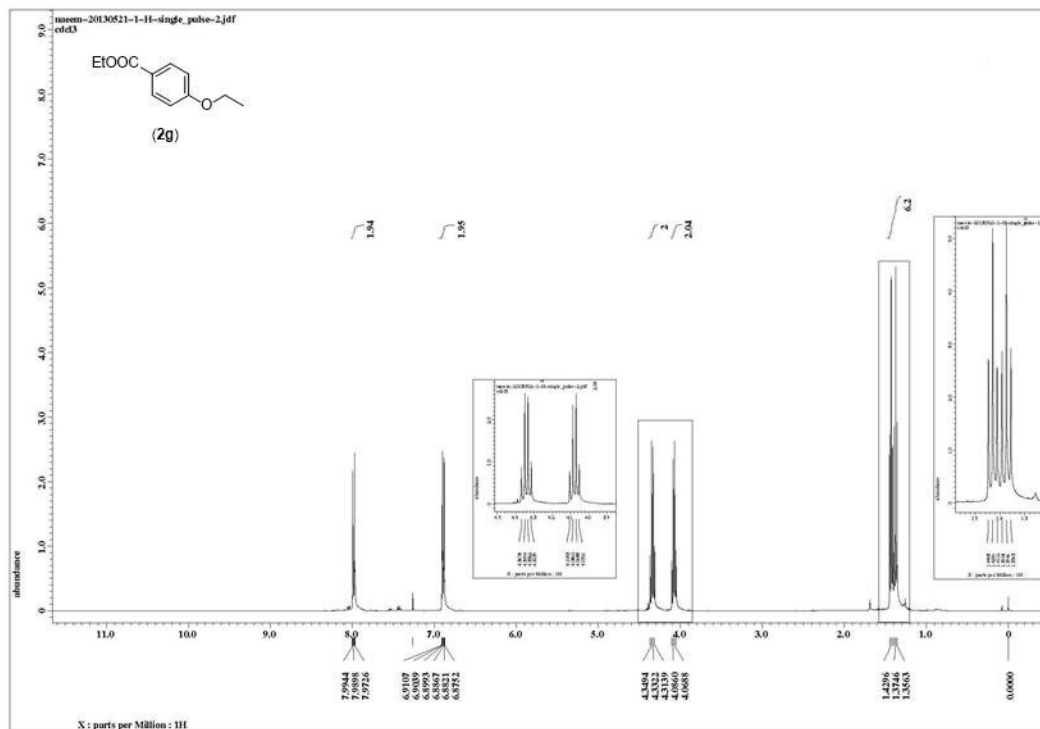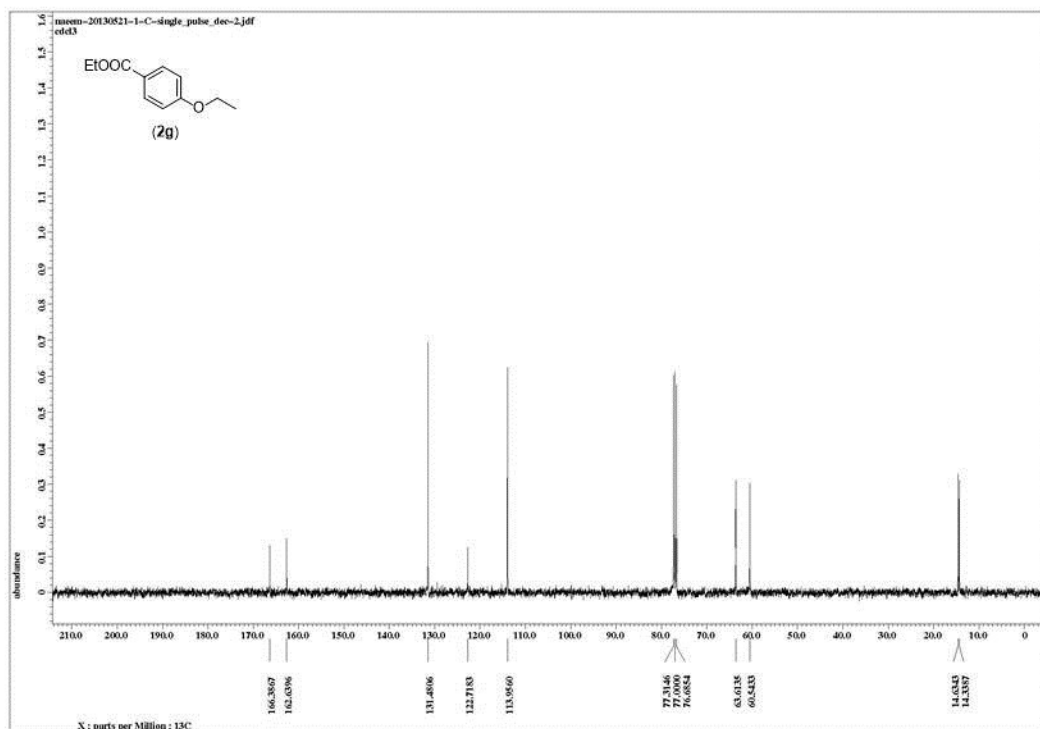

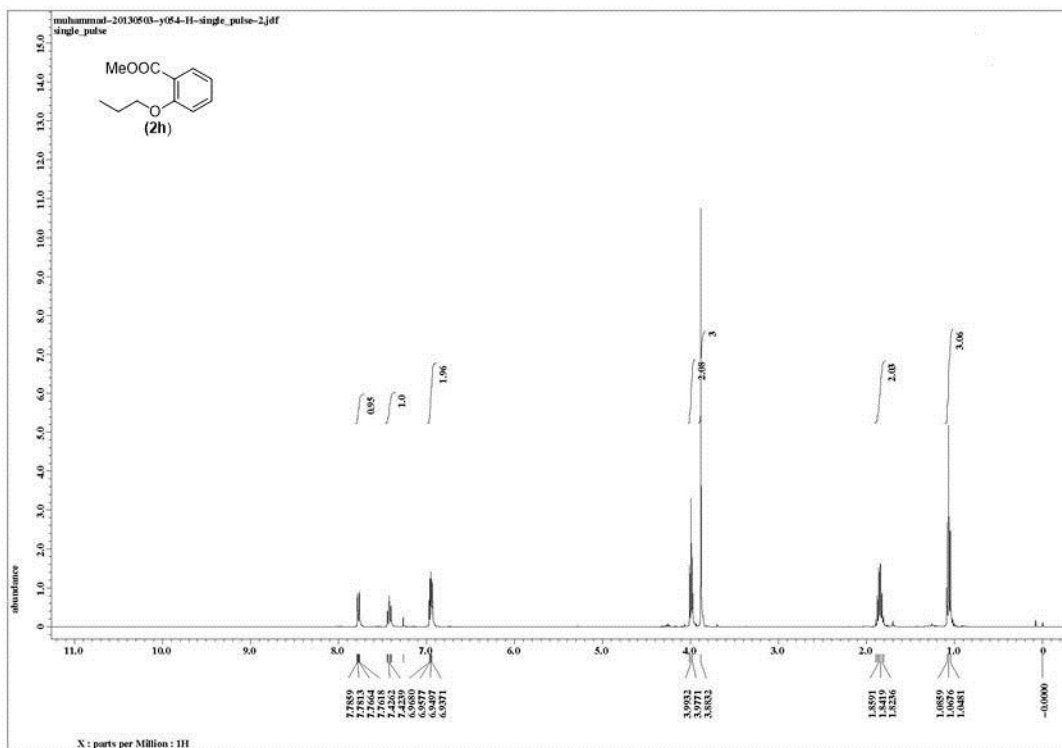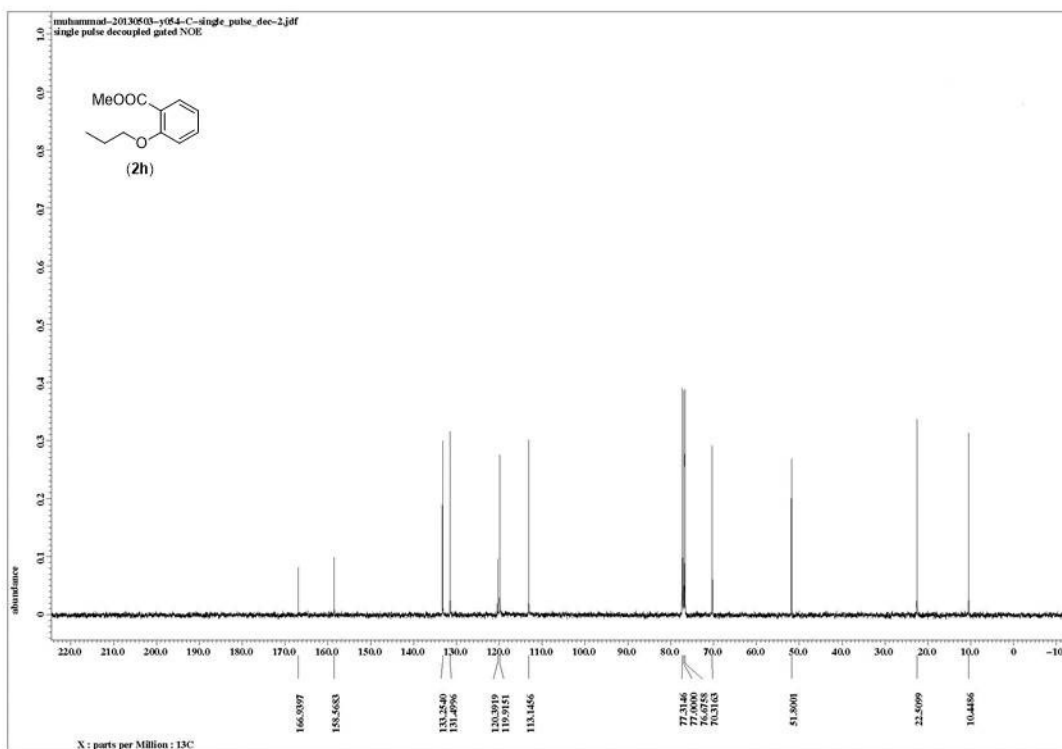



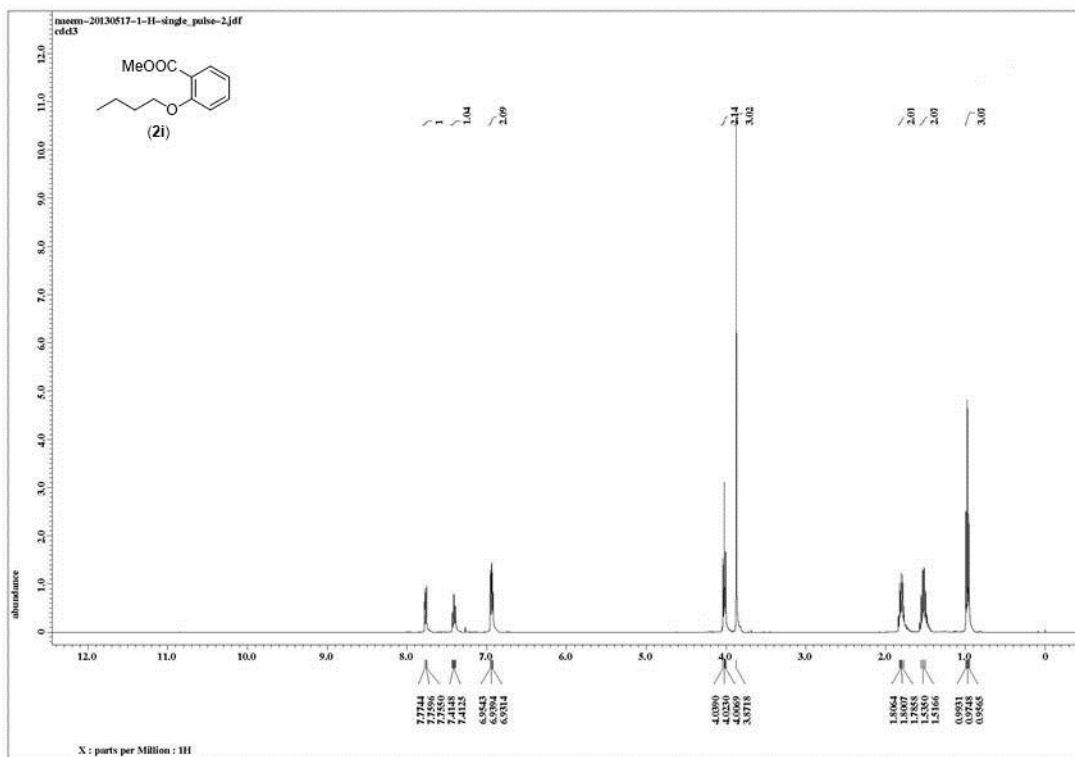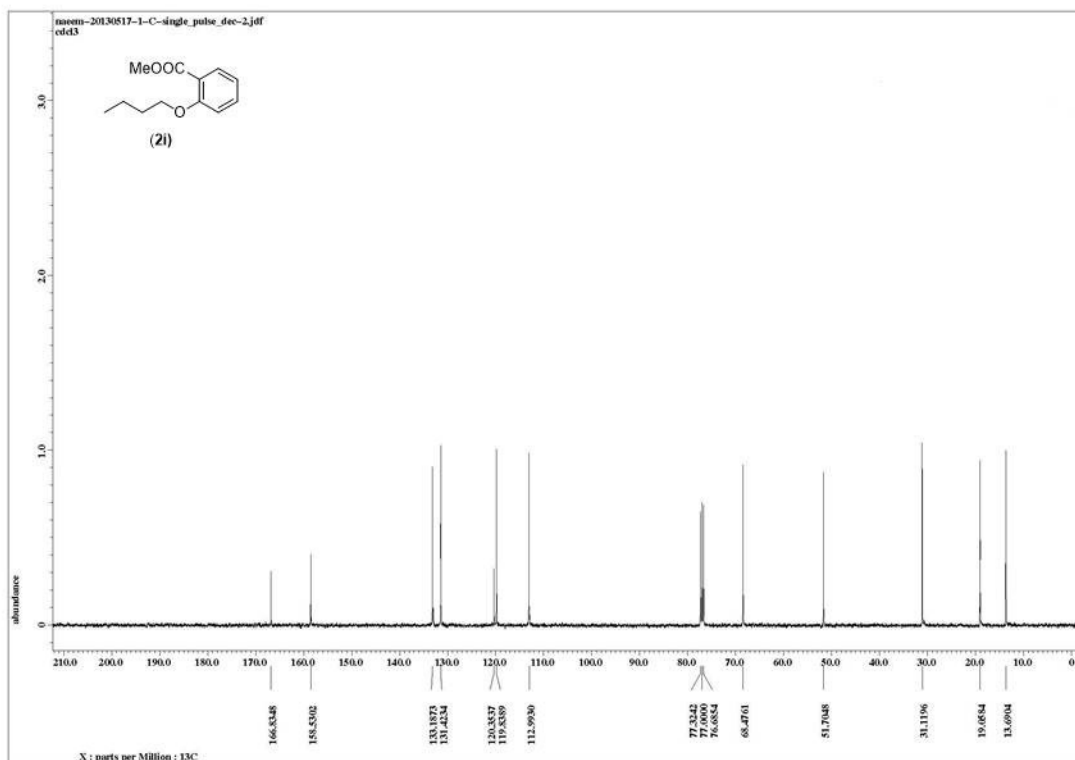

muhammad-20130524-V777-11-single\_pulse-2.jdf  
single\_pulse

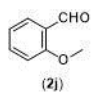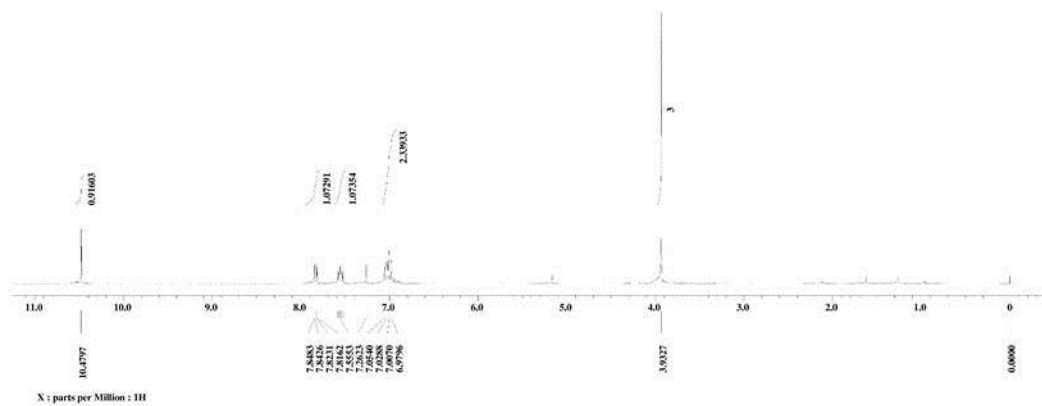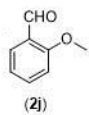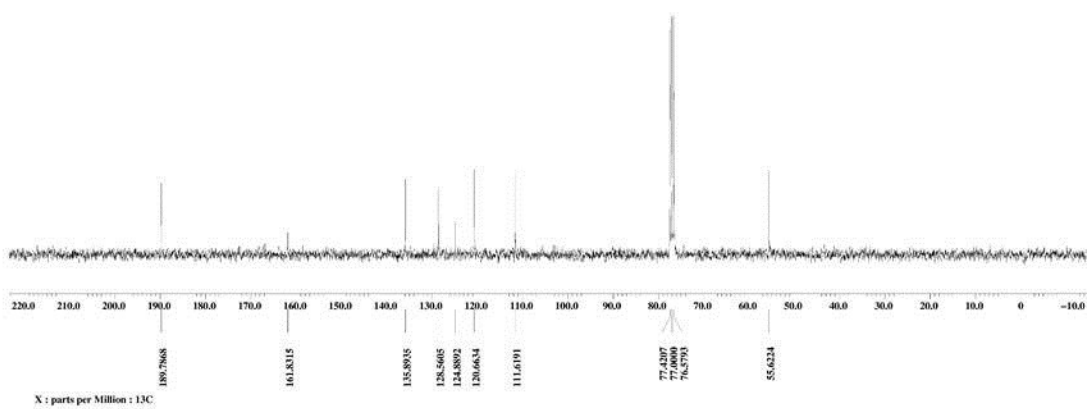

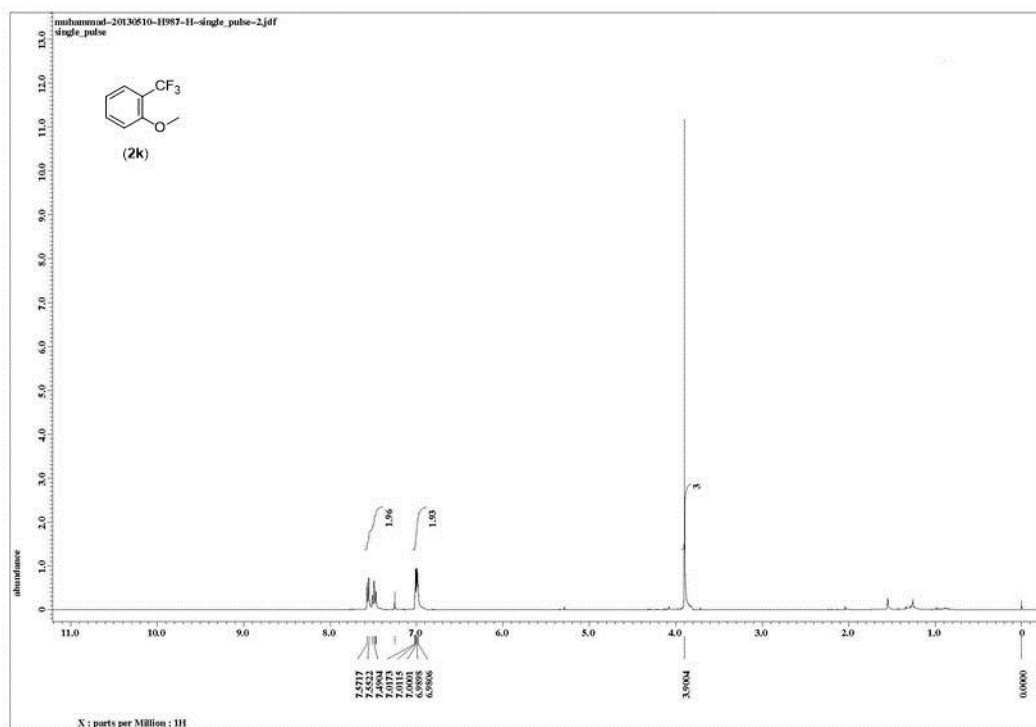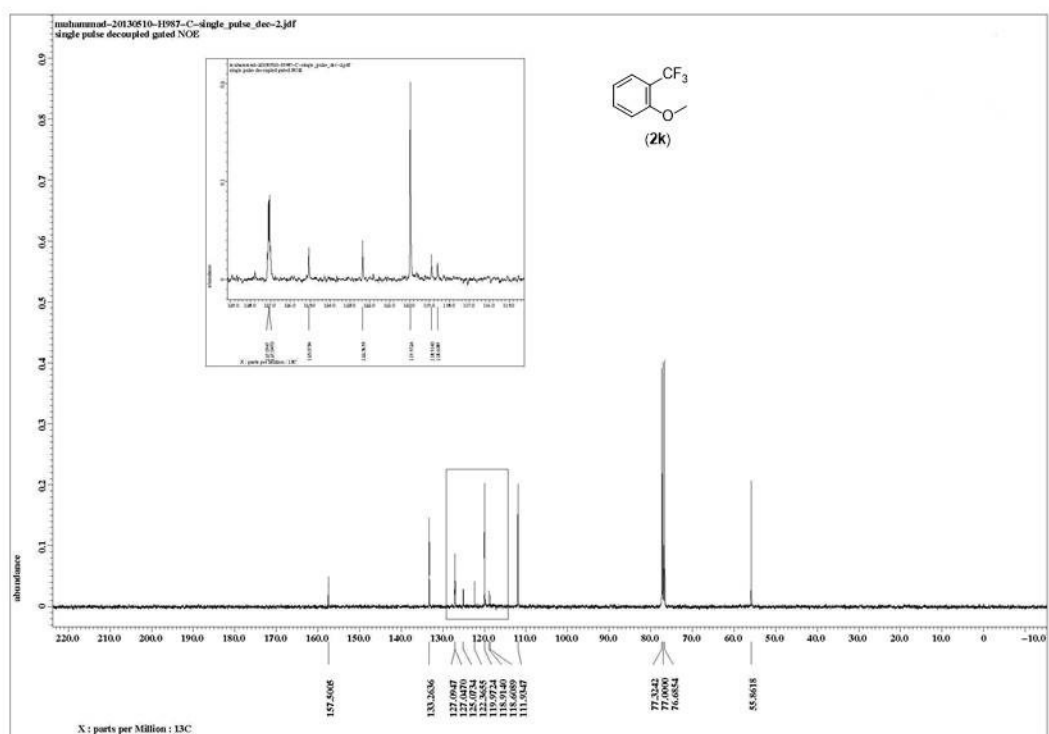

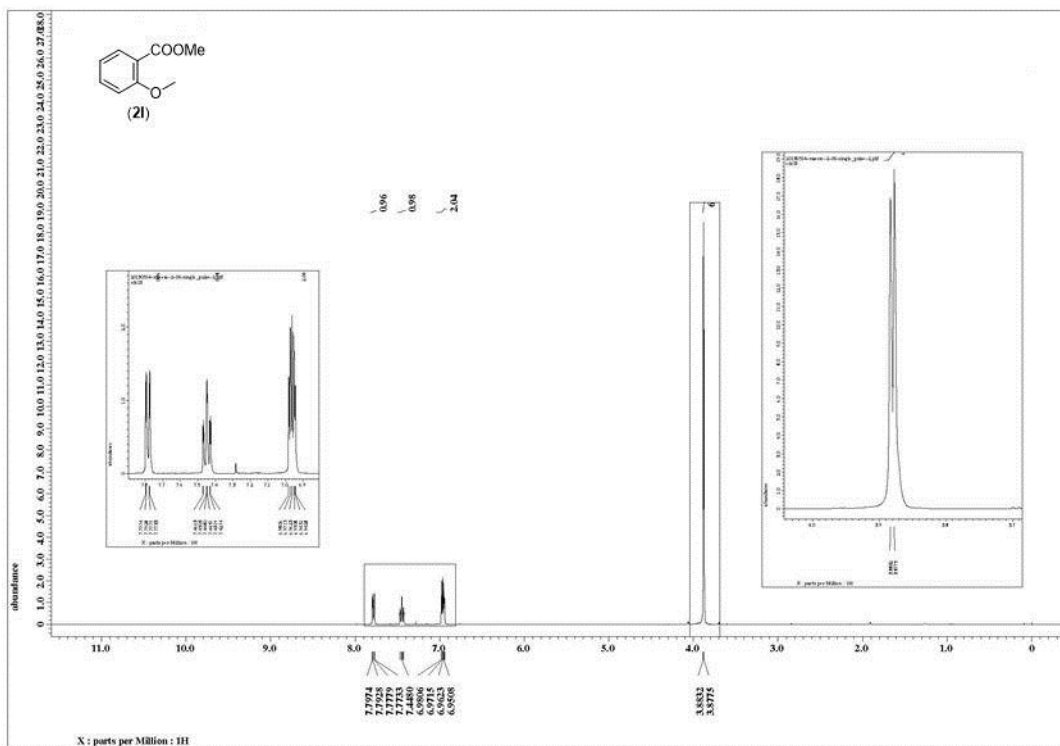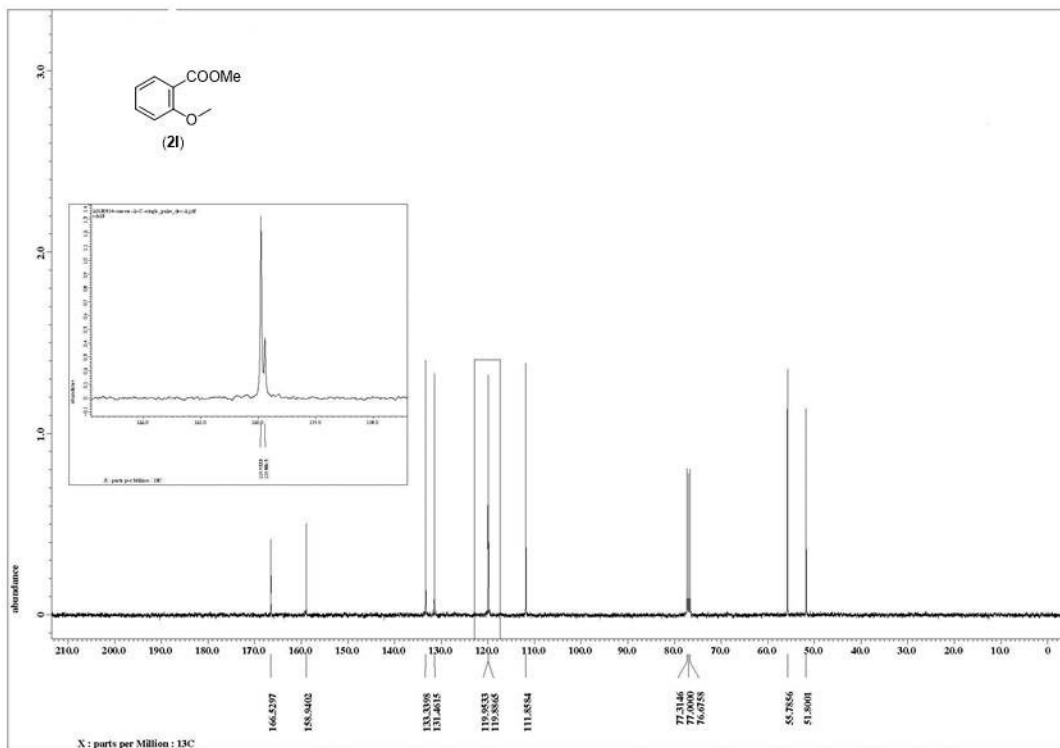

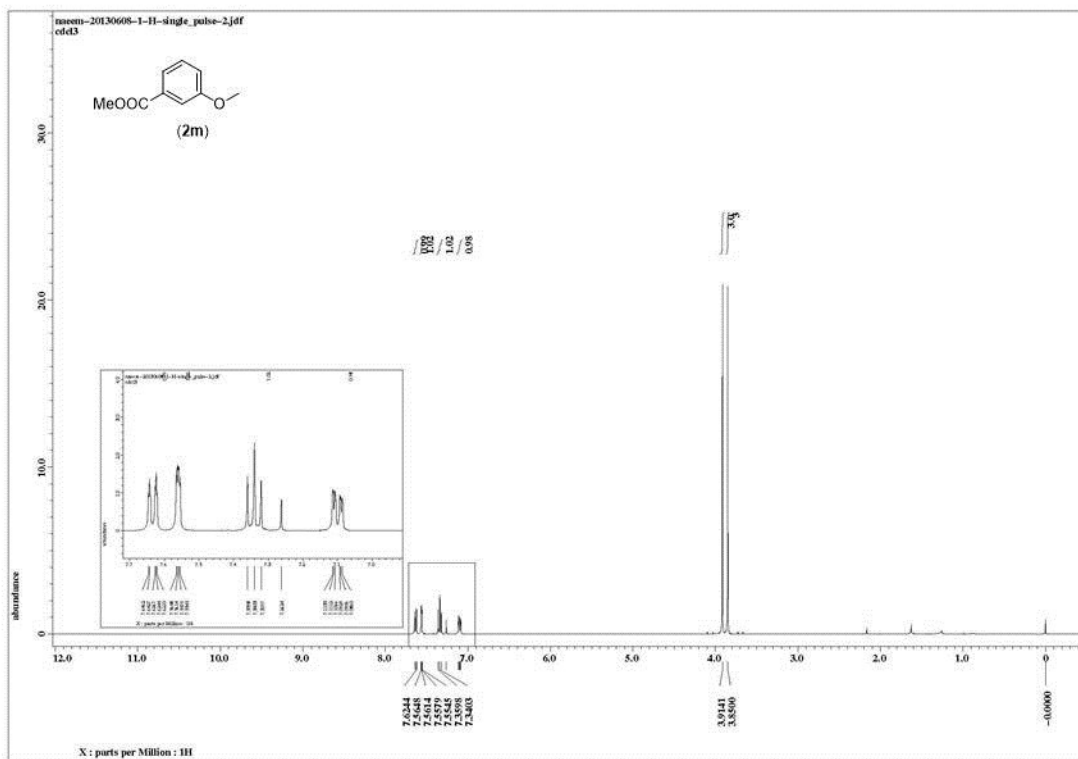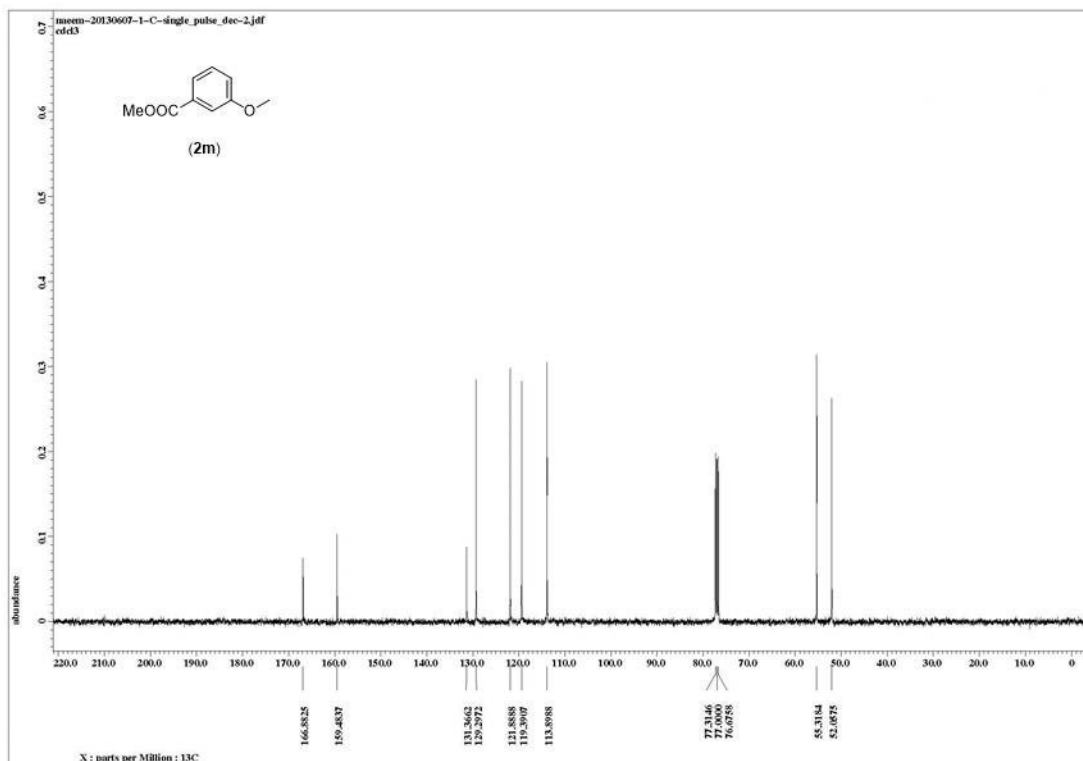

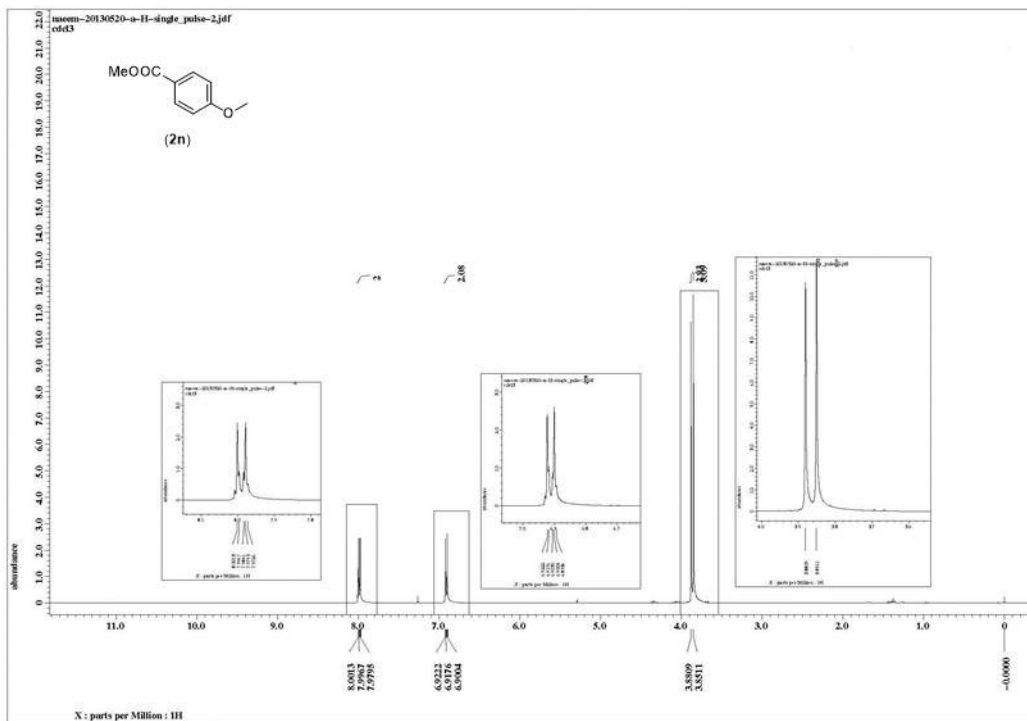

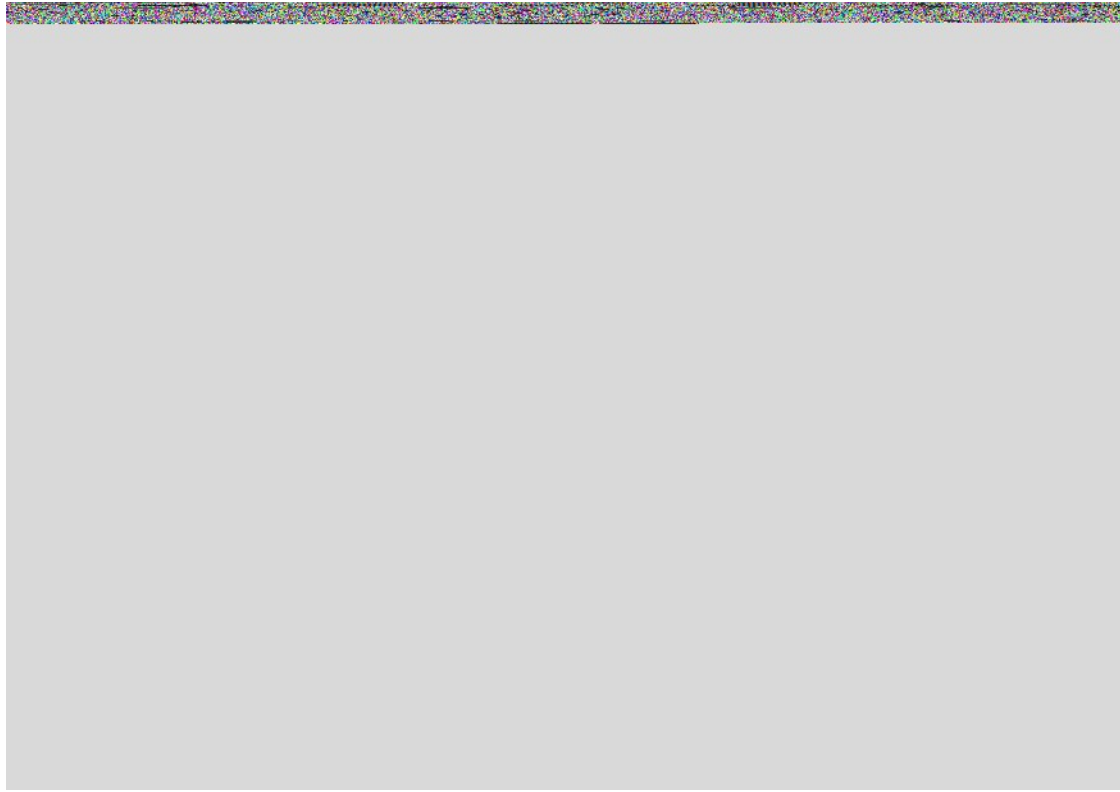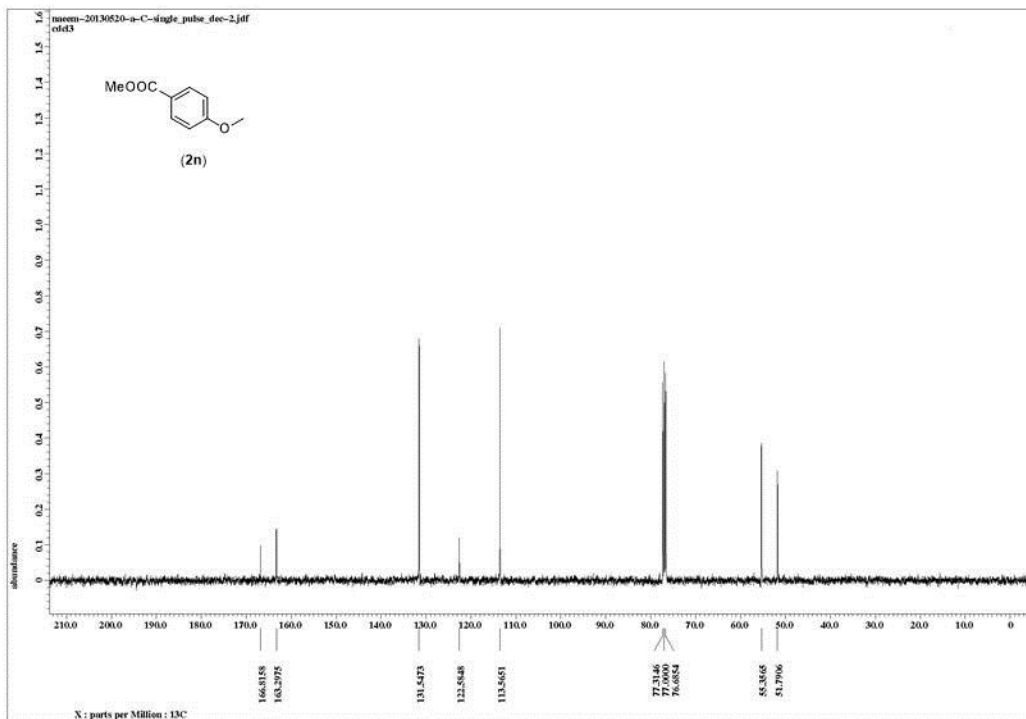

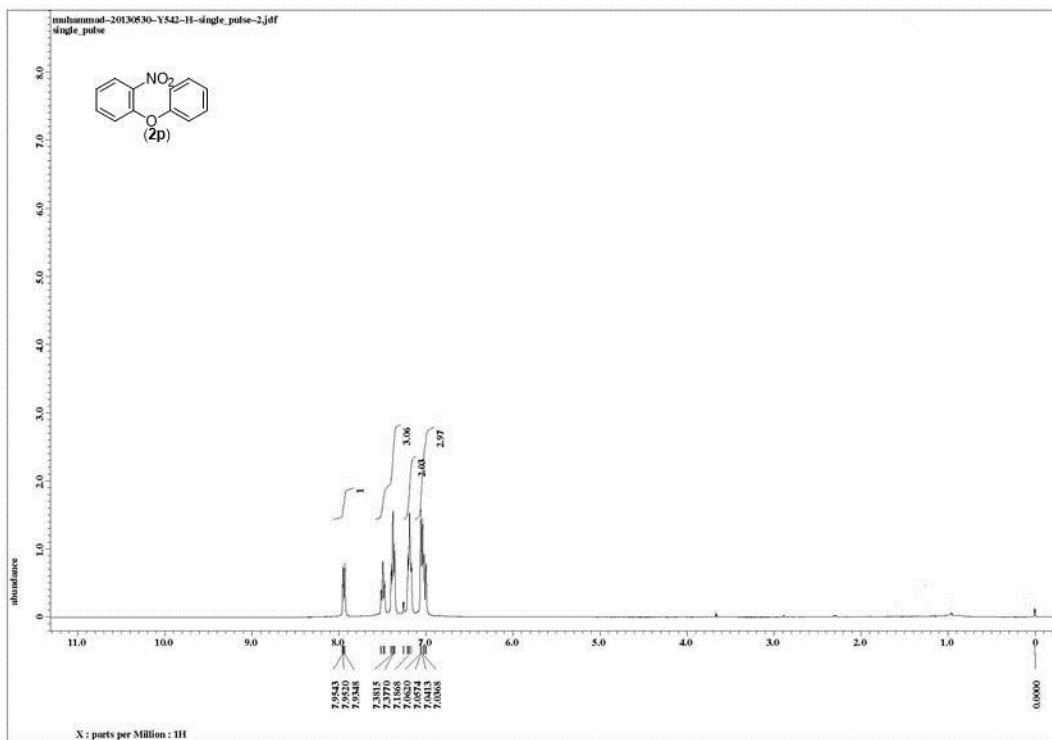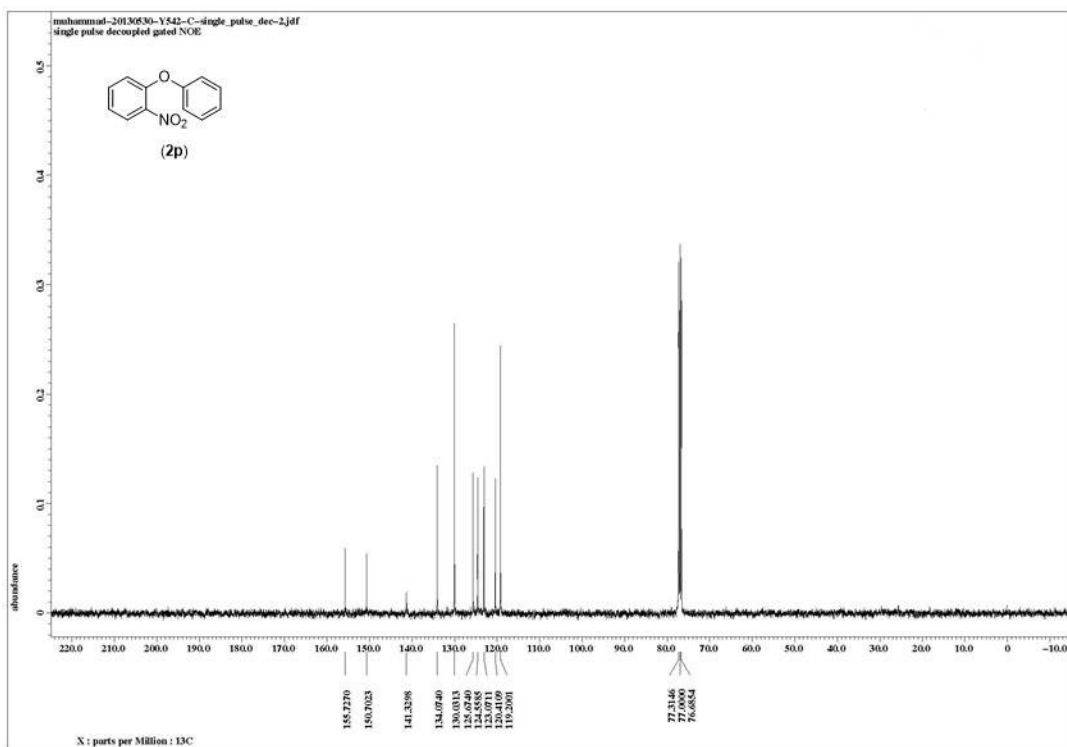



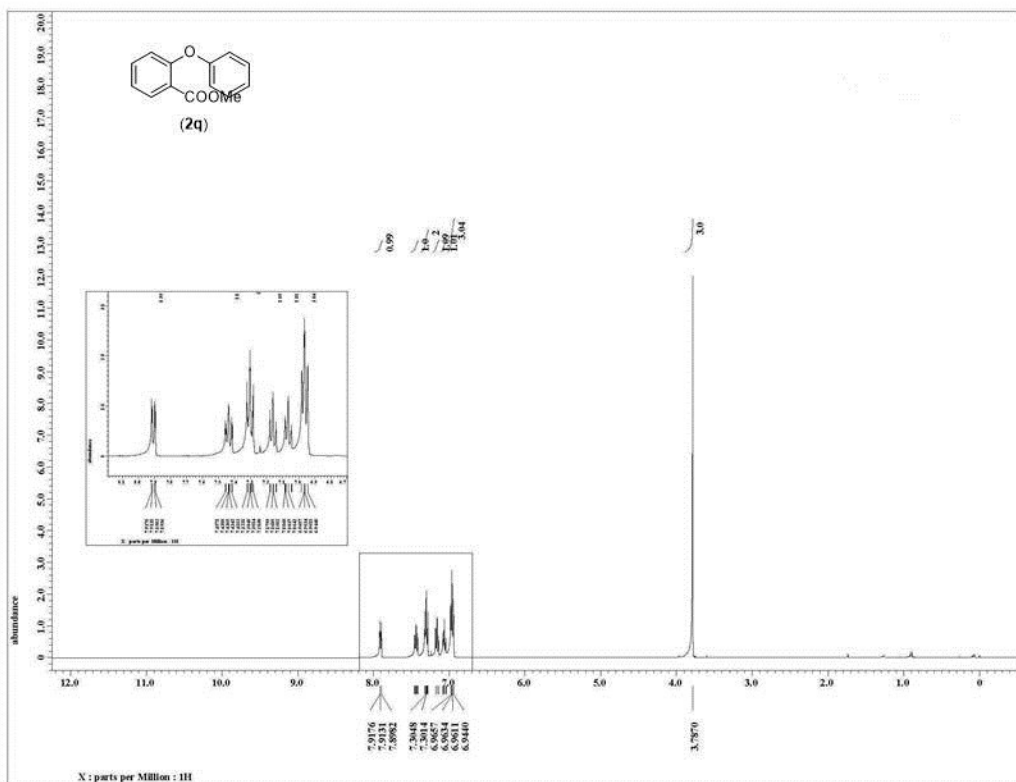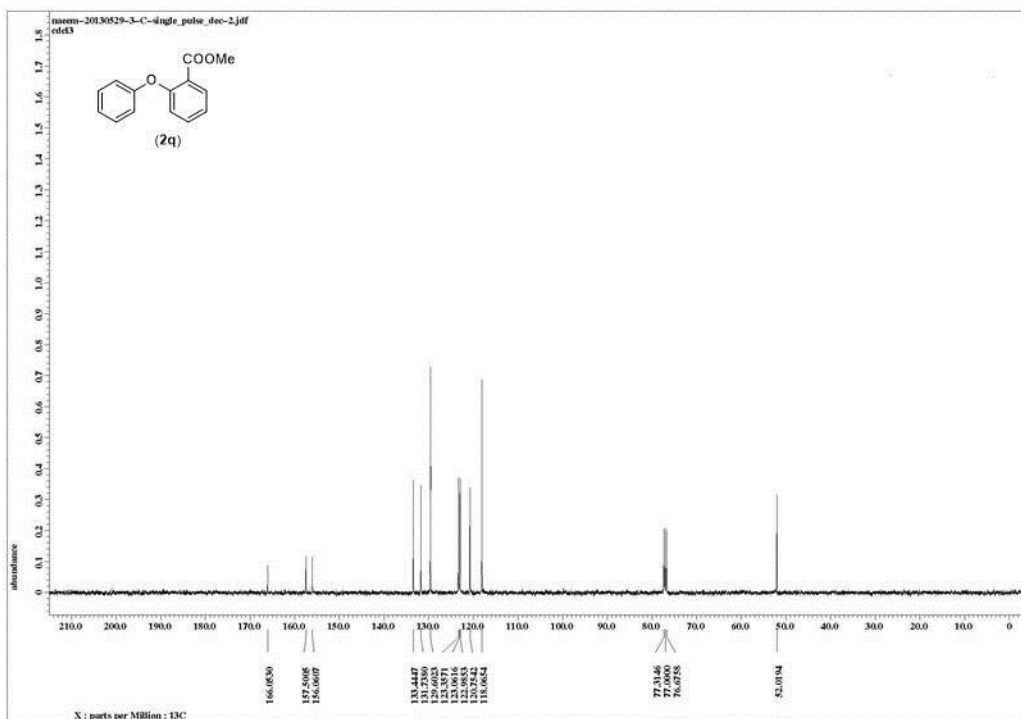

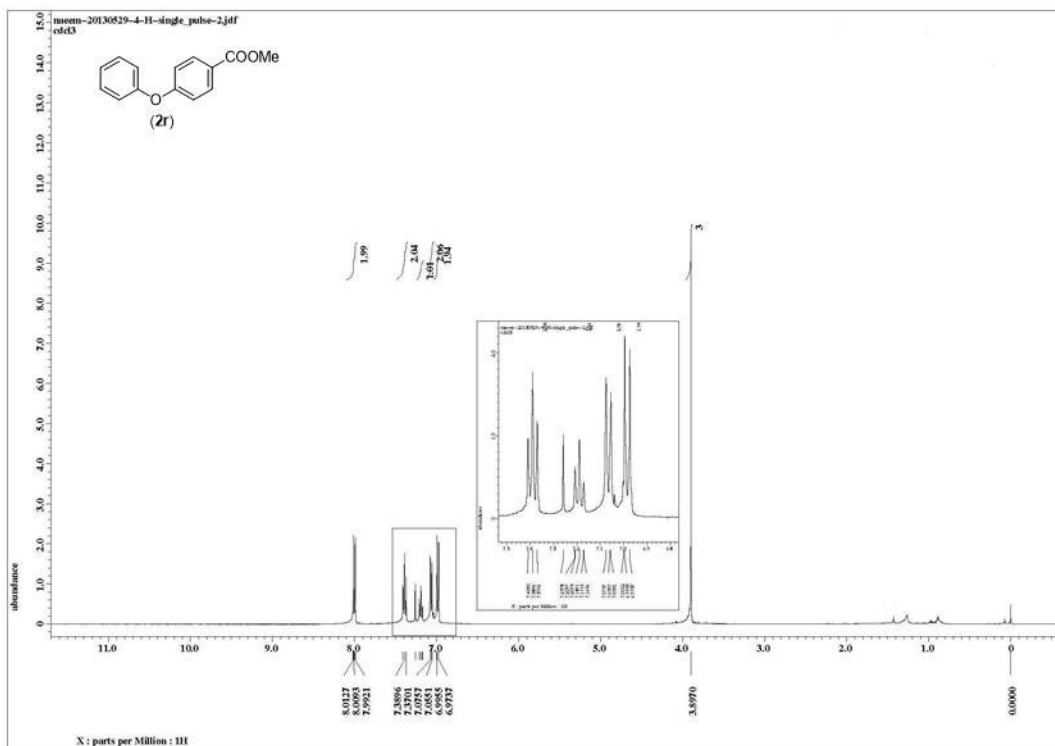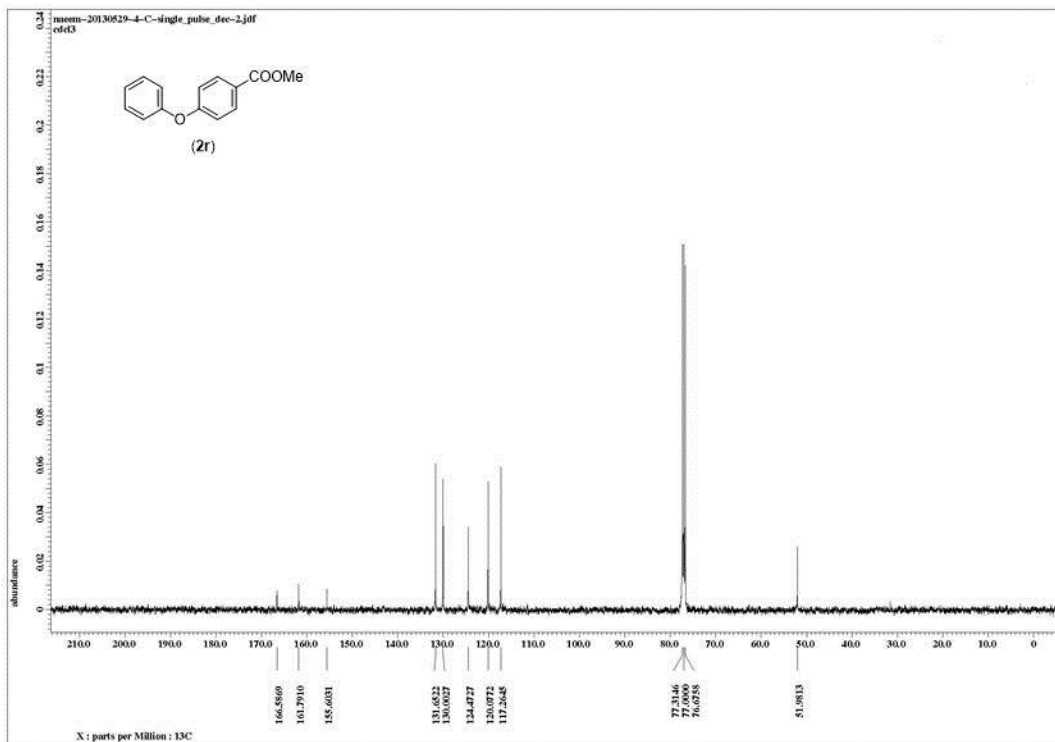

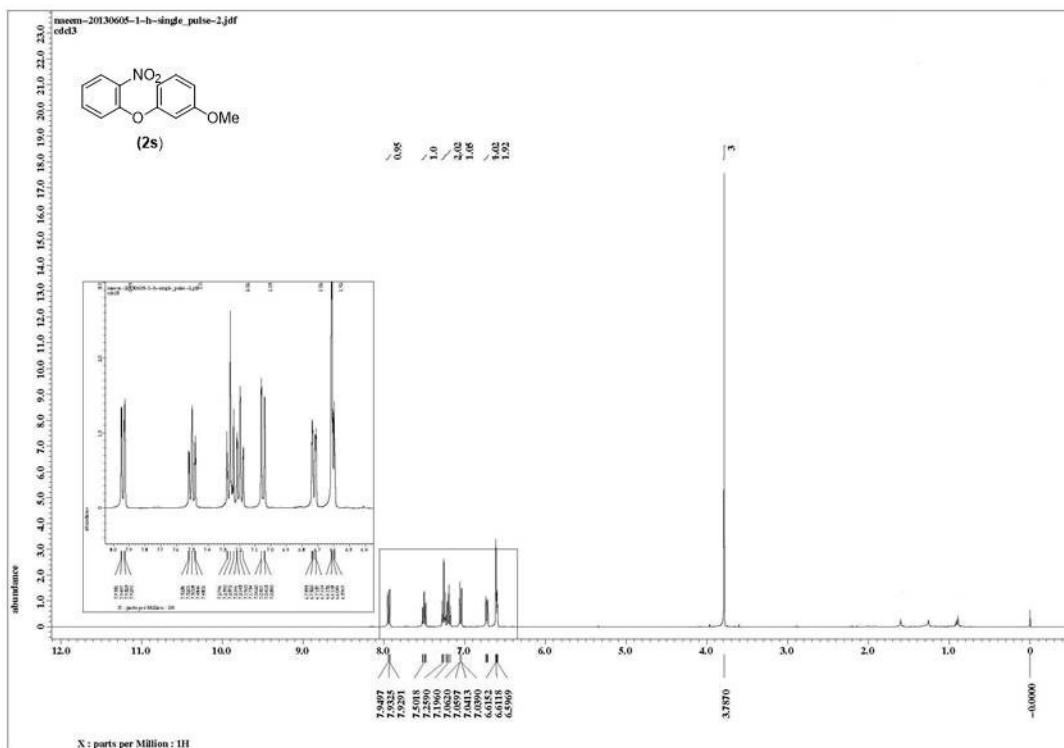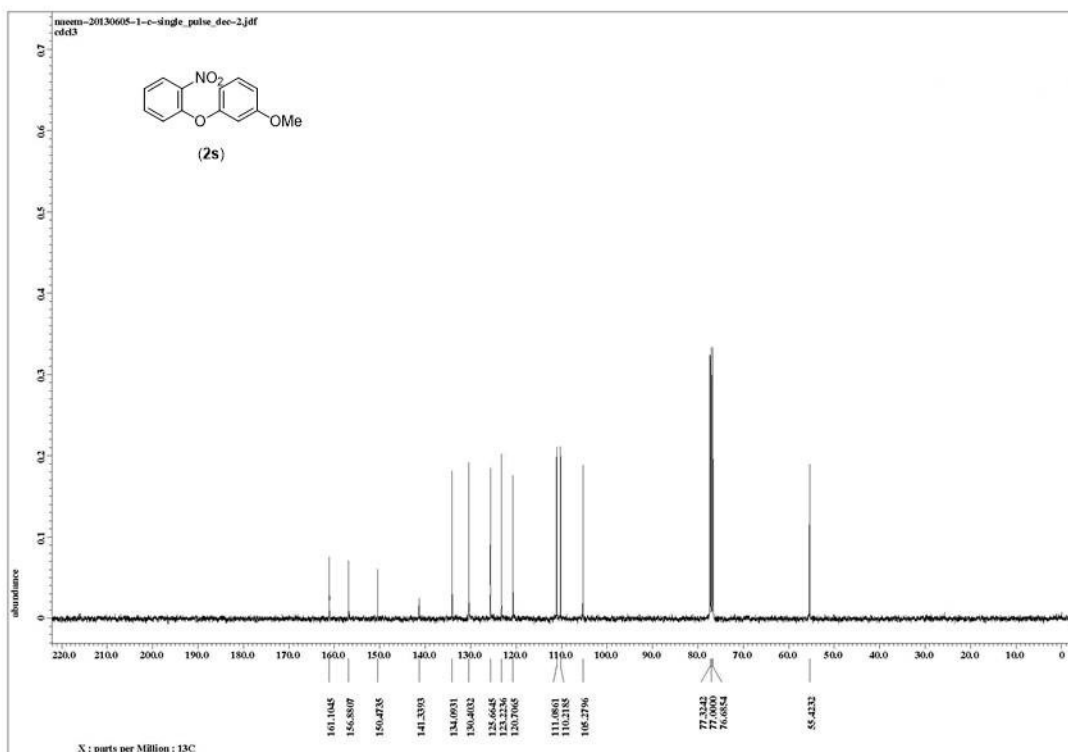

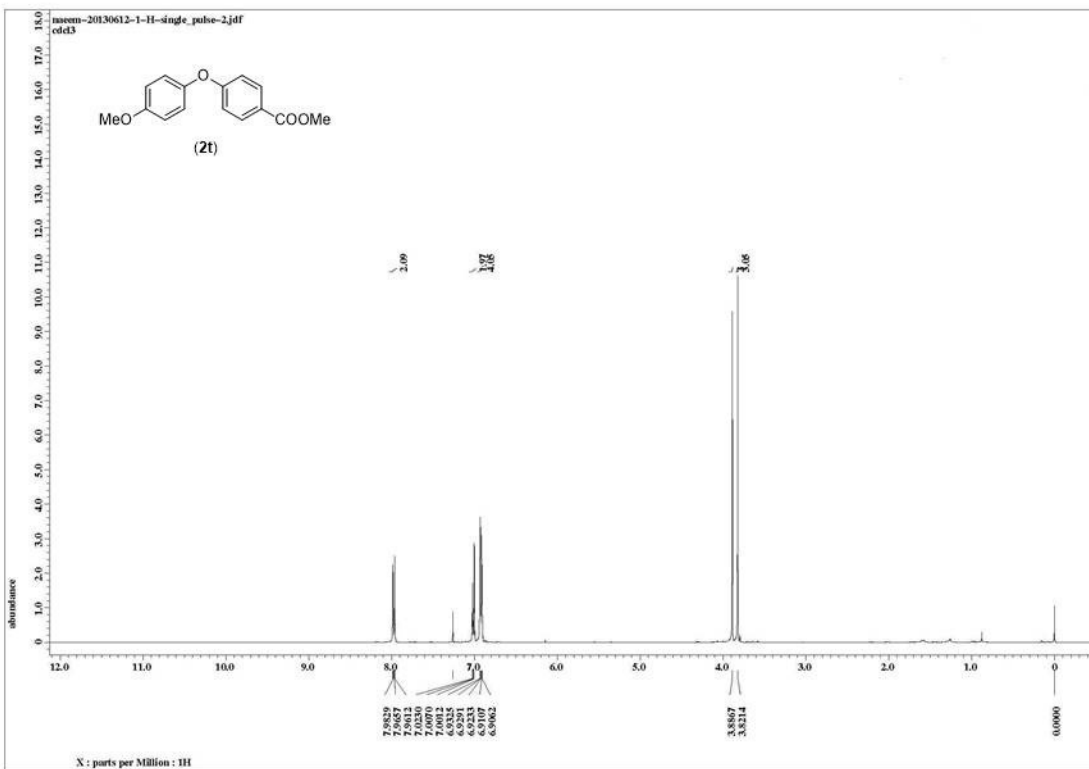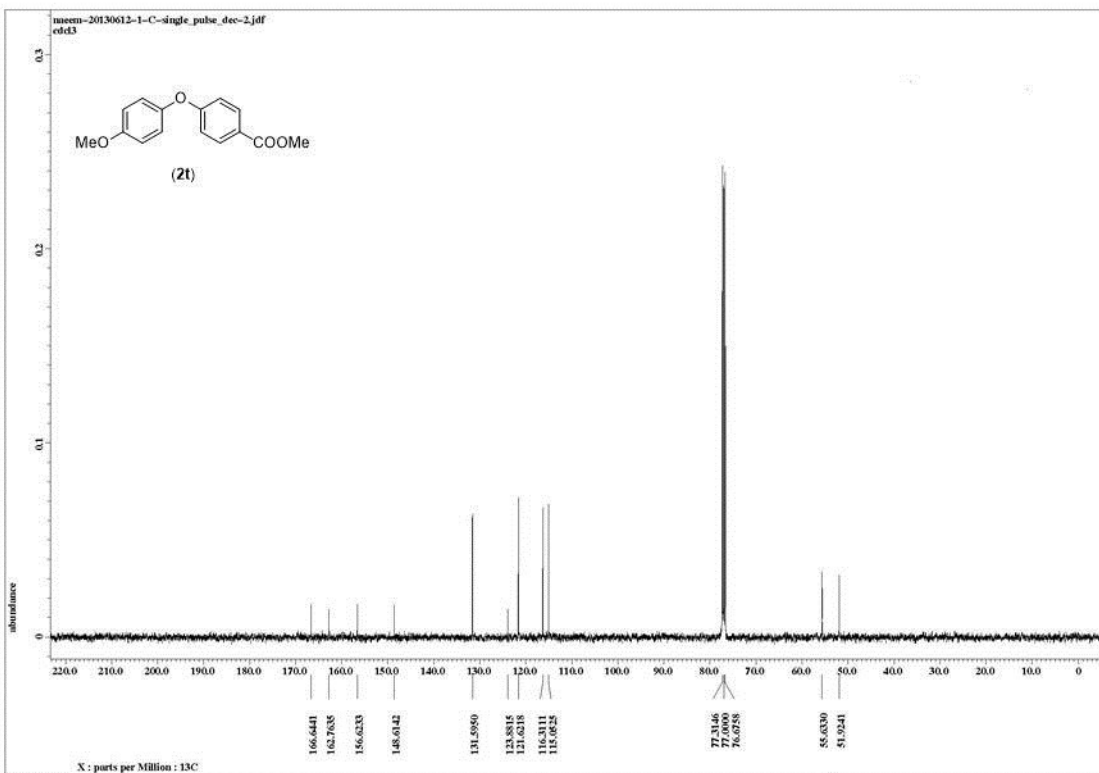

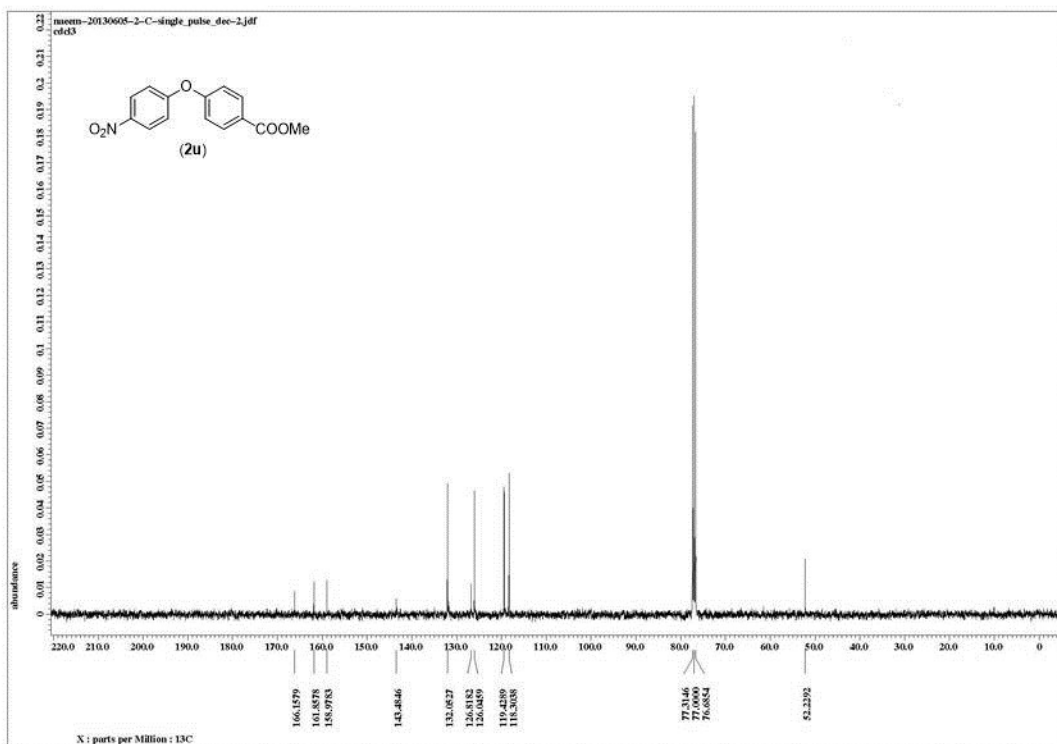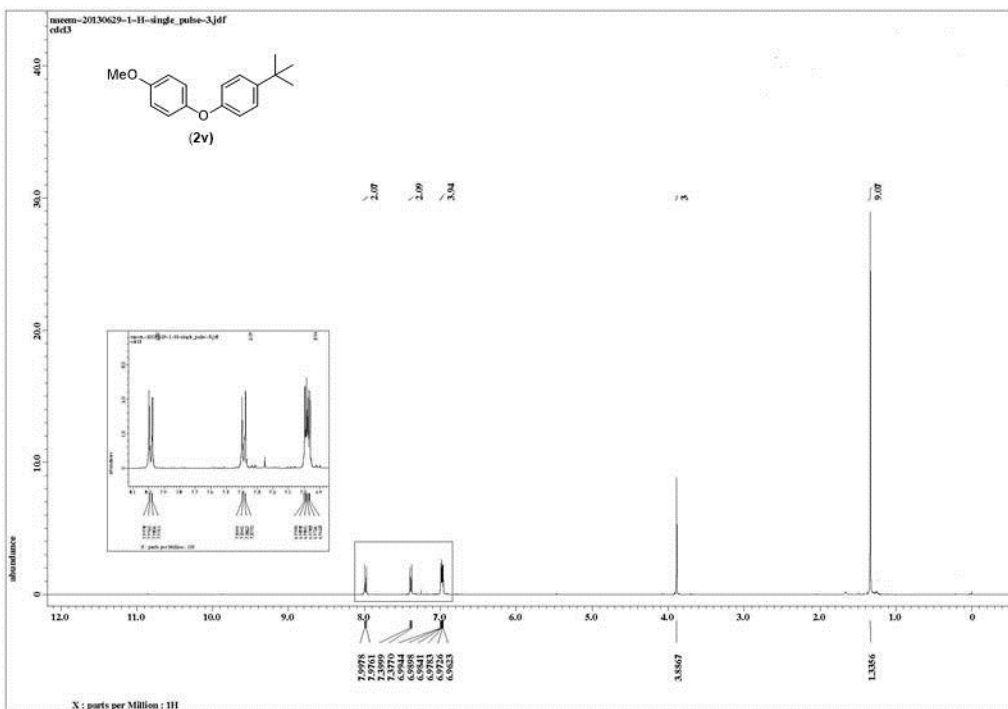

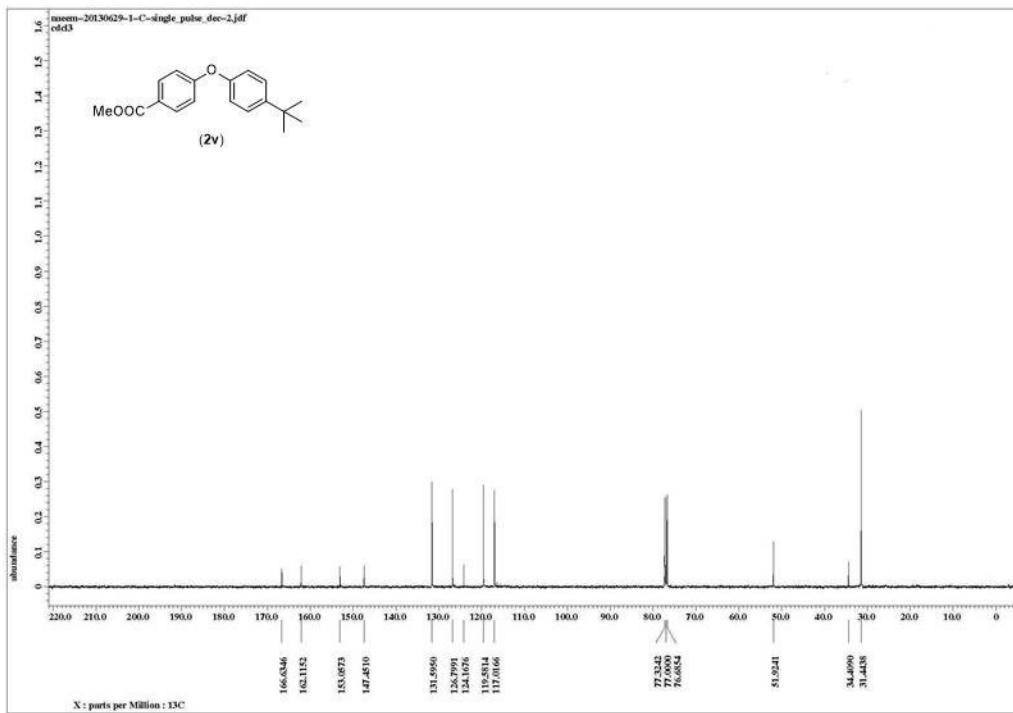

muhammads-20130621-G56-H-single\_pulse-2.fid  
single\_pulse

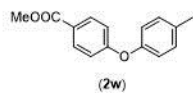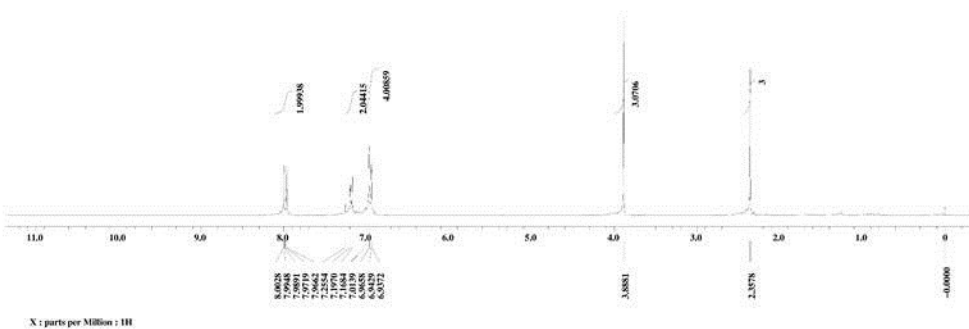

muhammads-20130621-G56-C-single\_pulse\_dec-2.jdf  
single pulse decoupled NOE

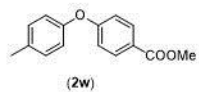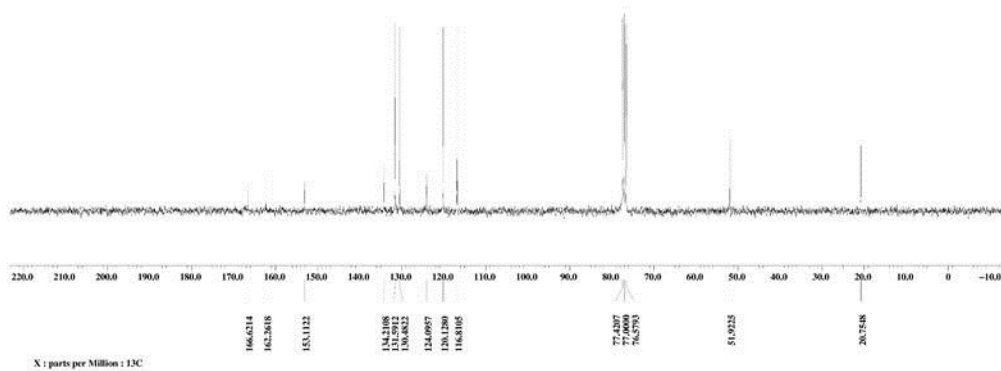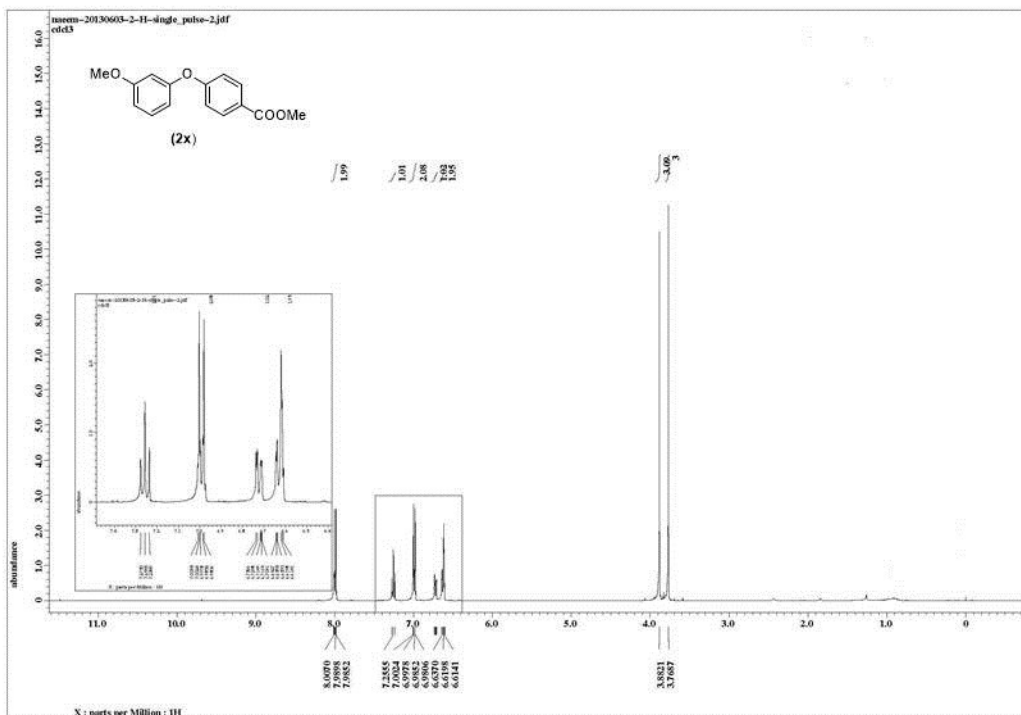

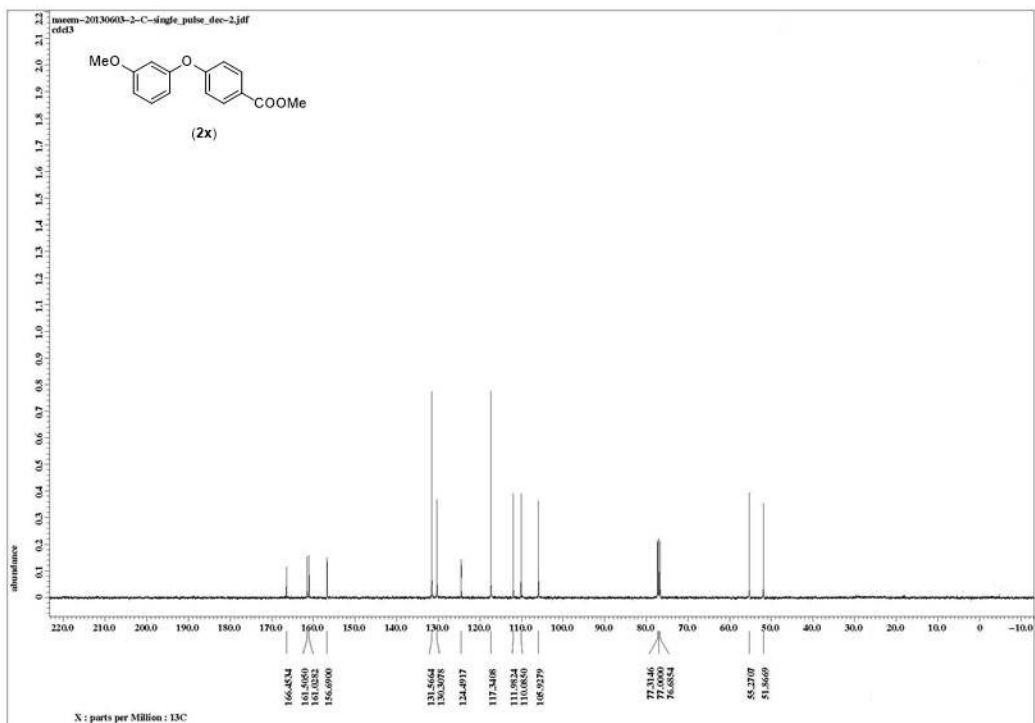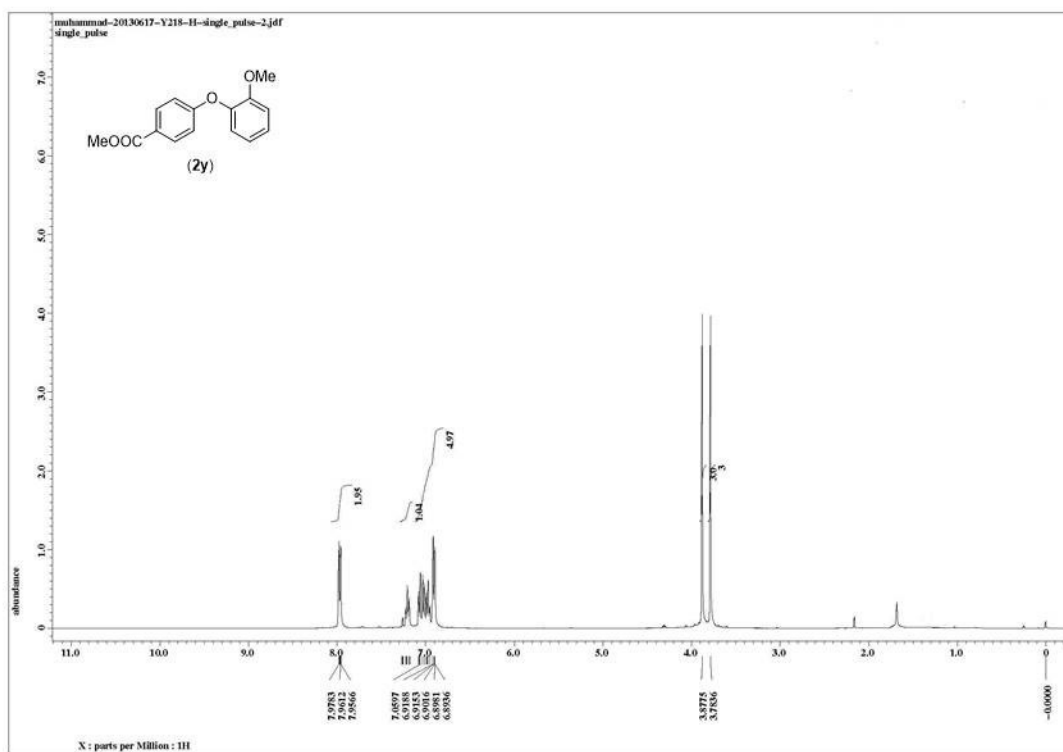



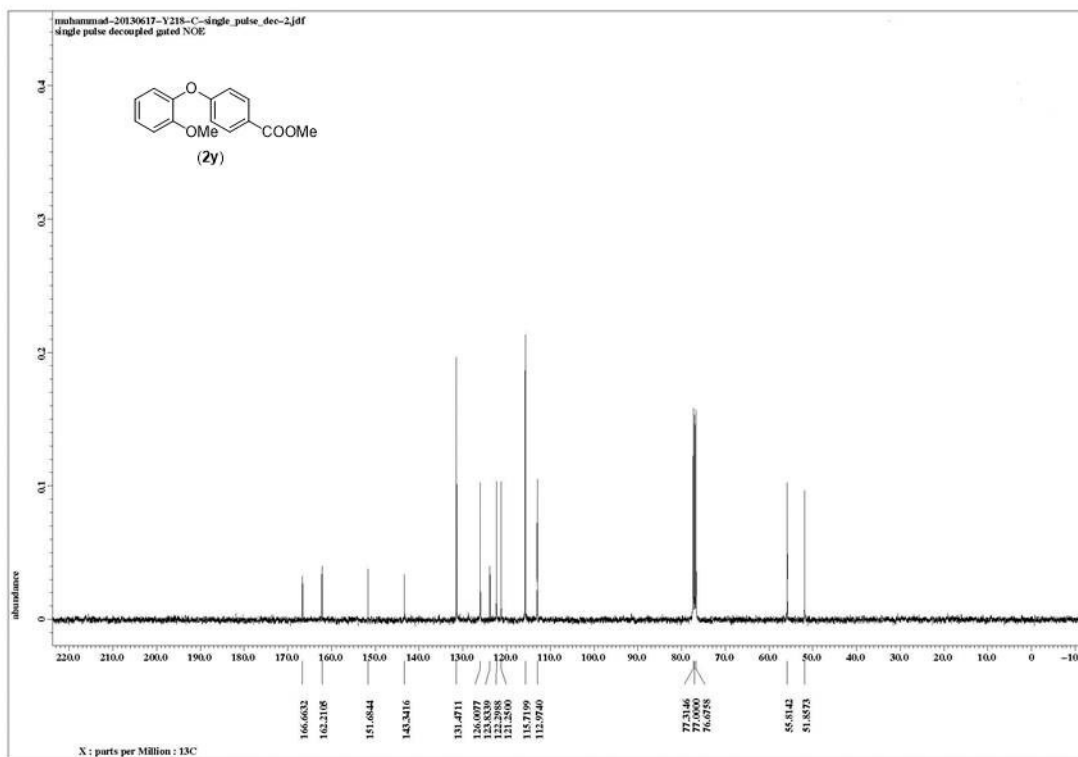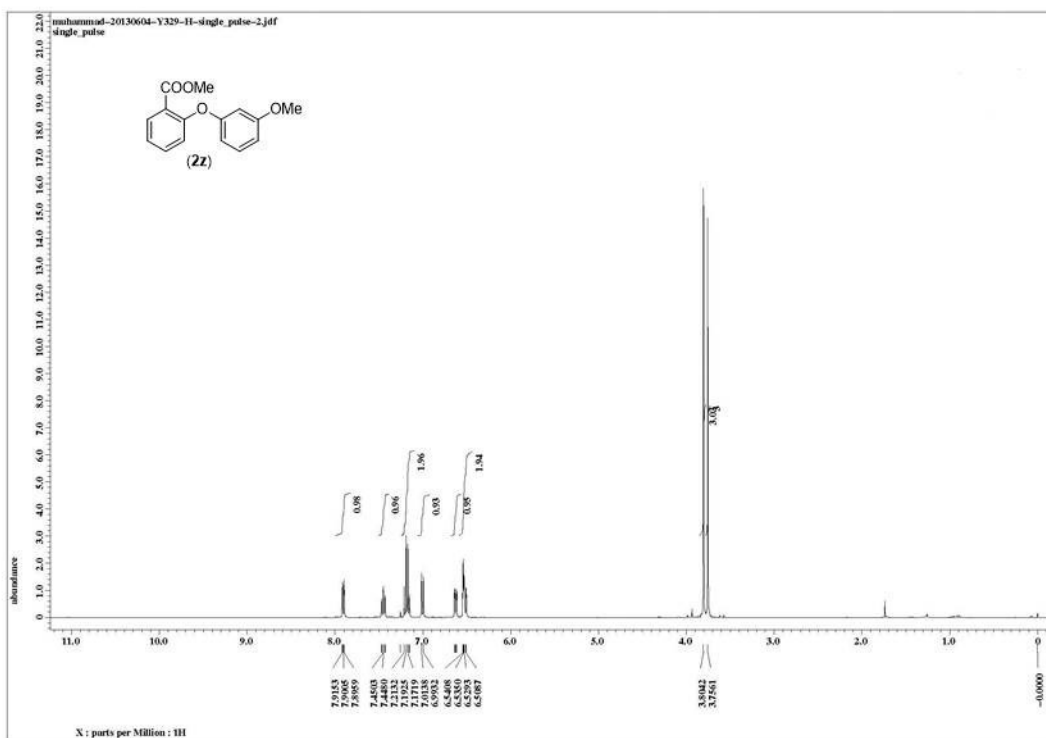

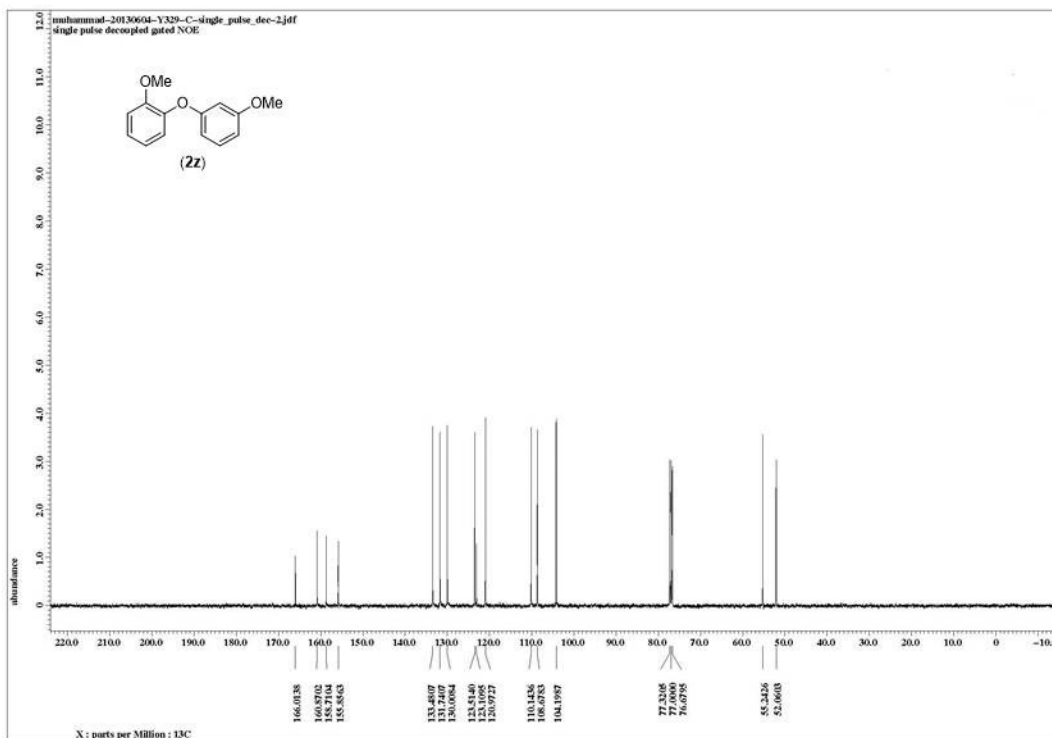

## Cartesian coordinates

$\text{Si}(\text{OMe})_4$

Charge 0

Spin multiplicity 1

| Atom | Coordinates |            |             |
|------|-------------|------------|-------------|
| Type | X           | Y          | Z           |
| O    | -1.38557300 | 0.00000000 | 0.88343600  |
| C    | -1.87881600 | 1.12877200 | 1.59649300  |
| H    | -1.97914300 | 1.99972500 | 0.93912000  |
| H    | -1.21654200 | 1.38923400 | 2.43200300  |
| H    | -2.86255700 | 0.86820600 | 1.99824800  |
| Si   | 0.00000000  | 0.00000000 | 0.00000000  |
| O    | 0.00000000  | 1.38557300 | -0.88343600 |

|                                              |             |             |             |
|----------------------------------------------|-------------|-------------|-------------|
| O                                            | 1.38557300  | 0.00000000  | 0.88343600  |
| O                                            | 0.00000000  | -1.38557300 | -0.88343600 |
| C                                            | 1.12877200  | 1.87881600  | -1.59649300 |
| H                                            | 1.38923400  | 1.21654200  | -2.43200300 |
| H                                            | 0.86820600  | 2.86255700  | -1.99824800 |
| H                                            | 1.99972500  | 1.97914300  | -0.93912000 |
| C                                            | -1.12877200 | -1.87881600 | -1.59649300 |
| H                                            | -0.86820600 | -2.86255700 | -1.99824800 |
| H                                            | -1.99972500 | -1.97914300 | -0.93912000 |
| H                                            | -1.38923400 | -1.21654200 | -2.43200300 |
| C                                            | 1.87881600  | -1.12877200 | 1.59649300  |
| H                                            | 2.86255700  | -0.86820600 | 1.99824800  |
| H                                            | 1.21654200  | -1.38923400 | 2.43200300  |
| H                                            | 1.97914300  | -1.99972500 | 0.93912000  |
| Sum of electronic and zero-point Energies=   |             |             | -750.008391 |
| Sum of electronic and thermal Energies=      |             |             | -749.994373 |
| Sum of electronic and thermal Enthalpies=    |             |             | -749.993429 |
| Sum of electronic and thermal Free Energies= |             |             | -750.050540 |

**1**

Charge -2

Spin multiplicity 1

| Atom | Coordinates |             |             |
|------|-------------|-------------|-------------|
| Type | X           | Y           | Z           |
| O    | -1.70133100 | 0.87978600  | -0.82064900 |
| C    | -2.10760100 | 2.14626100  | -0.42609800 |
| H    | -3.21669200 | 2.19476700  | -0.37775300 |
| H    | -1.79724800 | 2.92702500  | -1.15219100 |
| H    | -1.70779900 | 2.43406500  | 0.55466100  |
| Si   | -0.42777500 | -0.09246800 | -0.11559600 |
| O    | -0.84105500 | -0.85957800 | 1.36826300  |

|   |             |             |             |
|---|-------------|-------------|-------------|
| O | -1.13634000 | -1.46766000 | -1.00518200 |
| O | 0.19584600  | 1.31228500  | 0.84020000  |
| C | -0.11049800 | -0.70669300 | 2.55437200  |
| H | -0.31397700 | 0.25447200  | 3.05828400  |
| H | -0.40756800 | -1.51831400 | 3.24976200  |
| H | 0.96723500  | -0.77933900 | 2.36689400  |
| C | 1.05194200  | 2.27854900  | 0.32925200  |
| H | 0.51715200  | 3.08608500  | -0.22457400 |
| H | 1.58337200  | 2.78797800  | 1.16112900  |
| H | 1.81218700  | 1.87255200  | -0.35115300 |
| C | -2.41670100 | -1.91234400 | -0.75606300 |
| H | -3.18860700 | -1.12394100 | -0.87869800 |
| H | -2.68270300 | -2.72635800 | -1.46711700 |
| H | -2.54643300 | -2.32725900 | 0.26423500  |
| C | 2.29662900  | -0.53565400 | -0.55579200 |
| O | 0.98103200  | -0.24572700 | -1.03121800 |
| O | 2.37811900  | -1.17688000 | 0.52042200  |
| O | 3.20964300  | -0.11821300 | -1.30422900 |

Sum of electronic and zero-point Energies= -1013.735129

Sum of electronic and thermal Energies= -1013.718315

Sum of electronic and thermal Enthalpies= -1013.717371

Sum of electronic and thermal Free Energies= -1013.779963

**2**

Charge 0

Spin multiplicity 2

| Atom | Coordinates |             |             |
|------|-------------|-------------|-------------|
| Type | X           | Y           | Z           |
| C    | 2.33398000  | 0.00001300  | -0.00787300 |
| O    | 1.66922100  | -1.09078000 | -0.01000100 |
| O    | 1.66921400  | 1.09080000  | -0.00999700 |

|                                              |             |             |             |
|----------------------------------------------|-------------|-------------|-------------|
| Cu                                           | 0.00000000  | -0.00000800 | -0.00902900 |
| C                                            | -2.33397900 | -0.00002500 | -0.00783400 |
| O                                            | -1.66922300 | -1.09081500 | -0.00996100 |
| O                                            | -1.66921100 | 1.09076500  | -0.00996900 |
| C                                            | -3.83457100 | 0.00002300  | 0.02812500  |
| H                                            | -4.22567000 | -0.89976100 | -0.45157200 |
| H                                            | -4.16231500 | 0.00162100  | 1.07453100  |
| H                                            | -4.22559500 | 0.89848000  | -0.45413700 |
| C                                            | 3.83457000  | 0.00001200  | 0.02815500  |
| H                                            | 4.16223900  | -0.00018800 | 1.07459000  |
| H                                            | 4.22566300  | -0.89903600 | -0.45293800 |
| H                                            | 4.22566600  | 0.89922400  | -0.45262100 |
| Sum of electronic and zero-point Energies=   |             |             | -654.272395 |
| Sum of electronic and thermal Energies=      |             |             | -654.261269 |
| Sum of electronic and thermal Enthalpies=    |             |             | -654.260325 |
| Sum of electronic and thermal Free Energies= |             |             | -654.312745 |

### 3

Charge -1

Spin multiplicity 2

| Atom | Coordinates |             |             |
|------|-------------|-------------|-------------|
| Type | X           | Y           | Z           |
| O    | 2.34672100  | 0.05896400  | -0.32988800 |
| C    | 2.79923300  | 0.30531000  | -1.62710300 |
| H    | 2.45433200  | -0.46104900 | -2.34074700 |
| H    | 3.90221100  | 0.29691900  | -1.63357700 |
| H    | 2.46982900  | 1.28791700  | -2.00361300 |
| Si   | 0.66811400  | -0.00852300 | 0.05402100  |
| O    | 0.40047200  | -1.29094400 | -0.99818600 |
| O    | 0.89958300  | -0.32491900 | 1.68930300  |
| O    | 0.41438600  | 1.57507300  | -0.44649000 |

|                                              |             |             |              |
|----------------------------------------------|-------------|-------------|--------------|
| C                                            | -0.64986200 | -2.22026200 | -1.08510000  |
| H                                            | -0.30085300 | -3.06394600 | -1.69916000  |
| H                                            | -0.94156000 | -2.61277200 | -0.10180400  |
| H                                            | -1.53868200 | -1.79054300 | -1.56147300  |
| C                                            | -0.64680800 | 2.46739600  | -0.21815000  |
| H                                            | -0.30228100 | 3.47478600  | -0.49570200  |
| H                                            | -1.52617700 | 2.22290800  | -0.82496000  |
| H                                            | -0.95182000 | 2.49039400  | 0.83668600   |
| C                                            | 2.16495500  | -0.43980300 | 2.29412500   |
| H                                            | 2.75973700  | 0.47846600  | 2.19929100   |
| H                                            | 2.00478700  | -0.64370700 | 3.36342900   |
| H                                            | 2.76021000  | -1.25840800 | 1.86800400   |
| C                                            | -2.44092200 | -0.03705700 | 0.20314900   |
| O                                            | -1.25960500 | -0.11903000 | 0.66649200   |
| O                                            | -3.46793300 | -0.18702300 | 0.95481400   |
| O                                            | -2.77148700 | 0.19348700  | -1.00656900  |
| Sum of electronic and zero-point Energies=   |             |             | -1013.792368 |
| Sum of electronic and thermal Energies=      |             |             | -1013.774835 |
| Sum of electronic and thermal Enthalpies=    |             |             | -1013.773891 |
| Sum of electronic and thermal Free Energies= |             |             | -1013.839648 |

#### 4

Charge -1

Spin multiplicity 1

| Atom | Coordinates |             |             |
|------|-------------|-------------|-------------|
| Type | X           | Y           | Z           |
| C    | 2.76070200  | -0.16017200 | -0.00023700 |
| O    | 2.73851500  | -1.39279300 | -0.00102900 |
| O    | 1.74406500  | 0.64852300  | 0.00050800  |
| Cu   | -0.00019400 | -0.00042100 | 0.00041300  |
| C    | -2.76042600 | 0.16040000  | -0.00023000 |

|                                              |             |             |             |
|----------------------------------------------|-------------|-------------|-------------|
| O                                            | -1.74452800 | -0.64922300 | 0.00054400  |
| O                                            | -2.73699400 | 1.39299900  | -0.00102200 |
| C                                            | -4.10578300 | -0.58427100 | -0.00008800 |
| H                                            | -4.17509100 | -1.23385000 | -0.88077700 |
| H                                            | -4.17542400 | -1.23295300 | 0.88123500  |
| H                                            | -4.93819200 | 0.12448100  | -0.00061200 |
| C                                            | 4.10534800  | 0.58581000  | -0.00007000 |
| H                                            | 4.17438500  | 1.23448400  | 0.88130600  |
| H                                            | 4.93844100  | -0.12214000 | -0.00067300 |
| H                                            | 4.17400700  | 1.23553200  | -0.88070400 |
| Sum of electronic and zero-point Energies=   |             |             | -654.357108 |
| Sum of electronic and thermal Energies=      |             |             | -654.345325 |
| Sum of electronic and thermal Enthalpies=    |             |             | -654.344381 |
| Sum of electronic and thermal Free Energies= |             |             | -654.398942 |

## 5

Charge -1

Spin multiplicity 1

| Atom | Coordinates |             |             |
|------|-------------|-------------|-------------|
| Type | X           | Y           | Z           |
| O    | 1.57525000  | 0.51265700  | -0.84176900 |
| C    | 1.58095800  | 0.42695300  | -2.23871900 |
| H    | 2.53327400  | 0.83052500  | -2.61962400 |
| H    | 0.76282100  | 1.00652100  | -2.69413500 |
| H    | 1.49302500  | -0.61428400 | -2.58988800 |
| Si   | 0.21787500  | 0.00328800  | 0.07621800  |
| O    | 0.88178000  | 0.39024100  | 1.57427700  |
| O    | 0.33546900  | -1.61436000 | -0.40252400 |
| C    | -0.50773500 | -2.65013900 | 0.04314800  |
| H    | -1.53352200 | -2.54498000 | -0.33464700 |
| H    | -0.09789400 | -3.60284900 | -0.32503600 |

|                                              |             |             |             |
|----------------------------------------------|-------------|-------------|-------------|
| H                                            | -0.56728000 | -2.70089000 | 1.13886400  |
| C                                            | 2.23157100  | 0.73265800  | 1.77721100  |
| H                                            | 2.51211500  | 1.64975300  | 1.24320900  |
| H                                            | 2.38046300  | 0.89422700  | 2.85543300  |
| H                                            | 2.92001600  | -0.05969200 | 1.44949600  |
| C                                            | -1.96705700 | 0.68310600  | 0.03190400  |
| O                                            | -0.91575300 | 1.05588500  | -0.76520600 |
| O                                            | -1.45358100 | -0.19160700 | 0.88717100  |
| O                                            | -3.10812600 | 1.08970500  | -0.06094800 |
| Sum of electronic and zero-point Energies=   |             |             | -898.771087 |
| Sum of electronic and thermal Energies=      |             |             | -898.757648 |
| Sum of electronic and thermal Enthalpies=    |             |             | -898.756704 |
| Sum of electronic and thermal Free Energies= |             |             | -898.811624 |

6

Charge 0

Spin multiplicity 2

| Atom | Coordinates |             |             |
|------|-------------|-------------|-------------|
| Type | X           | Y           | Z           |
| Cu   | -0.46738300 | 0.00073500  | 0.15822000  |
| C    | 1.85464100  | -0.00068300 | -0.08425800 |
| O    | 1.19515700  | 1.09054900  | -0.01870500 |
| O    | 1.19440200  | -1.09123300 | -0.01718800 |
| C    | 3.35177400  | -0.00075800 | -0.20294100 |
| H    | 3.78542600  | 0.01974400  | 0.80399500  |
| H    | 3.69364000  | -0.90834800 | -0.70486400 |
| H    | 3.69013400  | 0.88940700  | -0.73770400 |
| O    | -2.21206900 | 0.00060100  | 0.42313500  |
| C    | -3.26103800 | -0.00122700 | -0.51190500 |
| H    | -2.92419700 | 0.00103500  | -1.55815200 |
| H    | -3.89405200 | 0.88307300  | -0.34632600 |



H            -3.88901500 -0.88955400 -0.34862500  
 Sum of electronic and zero-point Energies=        -540.892254  
 Sum of electronic and thermal Energies=           -540.883354  
 Sum of electronic and thermal Enthalpies=        -540.882410  
 Sum of electronic and thermal Free Energies=     -540.929621

7

Charge -2

Spin multiplicity 1

| Atom | Coordinates |             |             |
|------|-------------|-------------|-------------|
| Type | X           | Y           | Z           |
| O    | 1.90494400  | 0.13781900  | -0.12461100 |
| C    | 2.70599800  | -0.78232600 | 0.28486600  |
| Si   | -0.08694400 | 0.30234500  | -0.16109600 |
| O    | 0.11974400  | 0.29950800  | 1.52351200  |
| O    | 0.18801500  | 1.84105600  | -0.86485400 |
| O    | 0.08914200  | -1.00096900 | -1.23406800 |
| C    | -0.94569200 | 0.43151000  | 2.43653400  |
| H    | -0.52252500 | 0.36290700  | 3.45524200  |
| H    | -1.45202700 | 1.40735000  | 2.35058900  |
| H    | -1.69562100 | -0.35354600 | 2.29548500  |
| C    | -0.98150400 | -1.60405900 | -1.92213700 |
| H    | -0.56040000 | -2.40451000 | -2.55755800 |
| H    | -1.71384800 | -2.03256400 | -1.23034600 |
| H    | -1.50943700 | -0.89591100 | -2.58092200 |
| C    | 1.31285500  | 2.64344700  | -0.71404900 |
| H    | 2.16012200  | 2.32391600  | -1.34370000 |
| H    | 1.04660500  | 3.67820400  | -1.00625800 |
| H    | 1.68612100  | 2.67577500  | 0.32210100  |
| C    | -2.92537600 | -0.21812600 | 0.06793900  |
| O    | -1.78291800 | 0.54735900  | -0.27475200 |

|                                              |             |             |              |
|----------------------------------------------|-------------|-------------|--------------|
| O                                            | -4.01265200 | 0.32165100  | -0.22436200  |
| O                                            | -2.72243200 | -1.33620400 | 0.62304100   |
| C                                            | 4.18399800  | -0.41988200 | -0.03292500  |
| H                                            | 4.42330800  | 0.58299600  | 0.34319200   |
| H                                            | 4.86690000  | -1.15330600 | 0.41043600   |
| H                                            | 4.33562200  | -0.39837700 | -1.12041900  |
| O                                            | 2.47249700  | -1.85136300 | 0.85060900   |
| Sum of electronic and zero-point Energies=   |             |             | -1127.109758 |
| Sum of electronic and thermal Energies=      |             |             | -1127.090647 |
| Sum of electronic and thermal Enthalpies=    |             |             | -1127.089703 |
| Sum of electronic and thermal Free Energies= |             |             | -1127.159148 |

**8**

Charge -2

Spin multiplicity 1

| Atom | Coordinates |             |             |
|------|-------------|-------------|-------------|
| Type | X           | Y           | Z           |
| O    | -1.91965100 | 0.21703200  | 0.00018300  |
| C    | -2.67960500 | -0.86071000 | 0.00030700  |
| Si   | -0.12356200 | 0.31883900  | -0.00001300 |
| O    | -0.09492300 | -0.43187100 | -1.49291200 |
| O    | -0.12334000 | 1.99990200  | -0.00032700 |
| O    | -0.09459700 | -0.43136000 | 1.49313300  |
| C    | 0.94603500  | -0.55590600 | -2.43033000 |
| H    | 0.49906400  | -0.87133100 | -3.38343400 |
| H    | 1.47557300  | 0.39196100  | -2.59785100 |
| H    | 1.67755000  | -1.31338700 | -2.12623400 |
| C    | 0.94653900  | -0.55501700 | 2.43040800  |
| H    | 0.49972900  | -0.86996500 | 3.38374400  |
| H    | 1.67794100  | -1.31269500 | 2.12652800  |
| H    | 1.47617200  | 0.39289100  | 2.59738300  |

|                                              |             |             |              |
|----------------------------------------------|-------------|-------------|--------------|
| C                                            | -1.26025900 | 2.82531100  | -0.00032600  |
| H                                            | -1.89205700 | 2.67034500  | 0.88503300   |
| H                                            | -0.91468800 | 3.86933300  | -0.00026200  |
| H                                            | -1.89196500 | 2.67043800  | -0.88577600  |
| C                                            | 2.83534400  | -0.18531200 | -0.00011100  |
| O                                            | 1.79644600  | 0.55807900  | -0.00027400  |
| O                                            | 4.01177300  | 0.31362000  | -0.00004500  |
| O                                            | 2.85935200  | -1.45694700 | -0.00001800  |
| C                                            | -4.16377900 | -0.48559100 | -0.00013400  |
| H                                            | -4.39799500 | 0.12107500  | -0.88266600  |
| H                                            | -4.77954100 | -1.38807400 | 0.00074000   |
| H                                            | -4.39814000 | 0.12298800  | 0.88103200   |
| O                                            | -2.31598600 | -2.02395100 | 0.00064200   |
| Sum of electronic and zero-point Energies=   |             |             | -1127.152703 |
| Sum of electronic and thermal Energies=      |             |             | -1127.133306 |
| Sum of electronic and thermal Enthalpies=    |             |             | -1127.132361 |
| Sum of electronic and thermal Free Energies= |             |             | -1127.203341 |

9

Charge -1

Spin multiplicity 1

| Atom | Coordinates |             |             |
|------|-------------|-------------|-------------|
| Type | X           | Y           | Z           |
| Cu   | -0.66519800 | -0.41420000 | -0.00000200 |
| C    | 2.02979700  | 0.30228800  | 0.00000400  |
| O    | 1.78444600  | 1.51107200  | -0.00005600 |
| O    | 1.18379700  | -0.68085400 | 0.00008600  |
| C    | 3.49187200  | -0.18071800 | -0.00000100 |
| H    | 3.68145700  | -0.80550900 | 0.88126700  |
| H    | 3.68143100  | -0.80563500 | -0.88118700 |
| H    | 4.17876600  | 0.67011700  | -0.00007600 |

|                                              |             |             |             |
|----------------------------------------------|-------------|-------------|-------------|
| O                                            | -2.48572900 | -0.37377400 | -0.00013700 |
| C                                            | -3.17155000 | 0.83038400  | 0.00007800  |
| H                                            | -2.97141900 | 1.46962000  | 0.88705400  |
| H                                            | -4.26919000 | 0.64985300  | -0.00014400 |
| H                                            | -2.97112900 | 1.47008900  | -0.88649100 |
| Sum of electronic and zero-point Energies=   |             |             | -540.977690 |
| Sum of electronic and thermal Energies=      |             |             | -540.967728 |
| Sum of electronic and thermal Enthalpies=    |             |             | -540.966784 |
| Sum of electronic and thermal Free Energies= |             |             | -541.016457 |

## 10

Charge -1

Spin multiplicity 1

| Atom | Coordinates |             |             |
|------|-------------|-------------|-------------|
| Type | X           | Y           | Z           |
| O    | 1.41183900  | 0.15985400  | -0.28256500 |
| C    | 2.18979800  | -0.84964400 | 0.07380100  |
| Si   | -0.34043700 | 0.31887300  | 0.00792800  |
| O    | -0.13088100 | 0.35332400  | 1.67016000  |
| O    | -0.45403700 | 1.82947700  | -0.71368800 |
| C    | -1.18265500 | 0.44249300  | 2.60522700  |
| H    | -0.73427500 | 0.55737100  | 3.60200600  |
| H    | -1.83932800 | 1.30332000  | 2.41859700  |
| H    | -1.80913300 | -0.45797500 | 2.60555400  |
| C    | 0.62772600  | 2.67294100  | -1.02392500 |
| H    | 1.27154000  | 2.25126500  | -1.80737000 |
| H    | 0.21895200  | 3.62726500  | -1.38543700 |
| H    | 1.26254300  | 2.88086500  | -0.15036900 |
| C    | -2.04934200 | -0.94631000 | -0.77449500 |
| O    | -2.16634100 | 0.10880400  | 0.03283600  |
| O    | -2.91531300 | -1.65492500 | -1.23831400 |

|                                              |             |             |              |
|----------------------------------------------|-------------|-------------|--------------|
| O                                            | -0.69931800 | -1.07277900 | -0.98179900  |
| C                                            | 3.61705500  | -0.65080500 | -0.43423500  |
| H                                            | 4.01718300  | 0.30409400  | -0.07475200  |
| H                                            | 4.25362800  | -1.47137900 | -0.09584300  |
| H                                            | 3.61900300  | -0.61068000 | -1.52965100  |
| O                                            | 1.86536500  | -1.83130800 | 0.71687300   |
| Sum of electronic and zero-point Energies=   |             |             | -1012.130267 |
| Sum of electronic and thermal Energies=      |             |             | -1012.114781 |
| Sum of electronic and thermal Enthalpies=    |             |             | -1012.113836 |
| Sum of electronic and thermal Free Energies= |             |             | -1012.174800 |

## 11

Charge 0

Spin multiplicity 2

| Atom                                         | Coordinates |             |             |
|----------------------------------------------|-------------|-------------|-------------|
| Type                                         | X           | Y           | Z           |
| Cu                                           | -0.00000400 | 0.00002200  | 0.00005100  |
| O                                            | -1.66042500 | -0.54964800 | -0.00000500 |
| O                                            | 1.66044400  | 0.54963700  | -0.00000200 |
| C                                            | 2.82930600  | -0.23275500 | -0.00007500 |
| H                                            | 2.64015000  | -1.31490400 | 0.00002900  |
| H                                            | 3.43140100  | 0.01766100  | 0.88603100  |
| H                                            | 3.43123000  | 0.01754600  | -0.88632800 |
| C                                            | -2.82931000 | 0.23269700  | -0.00007500 |
| H                                            | -3.43133600 | -0.01777900 | -0.88620100 |
| H                                            | -3.43128600 | -0.01756000 | 0.88615000  |
| H                                            | -2.64016300 | 1.31484500  | -0.00020400 |
| Sum of electronic and zero-point Energies=   |             |             | -427.517844 |
| Sum of electronic and thermal Energies=      |             |             | -427.509708 |
| Sum of electronic and thermal Enthalpies=    |             |             | -427.508764 |
| Sum of electronic and thermal Free Energies= |             |             | -427.553182 |

**TS<sub>(b)</sub>**

Charge -1

Spin multiplicity 2

| Atom | Coordinates |             |             |
|------|-------------|-------------|-------------|
| Type | X           | Y           | Z           |
| O    | -2.47318200 | -0.47730900 | 0.26344300  |
| C    | -2.66765300 | -1.12096500 | 1.45743600  |
| H    | -2.05173600 | -2.03964300 | 1.48398800  |
| H    | -3.72546200 | -1.39636300 | 1.62960900  |
| H    | -2.30531400 | -0.50326600 | 2.29946800  |
| Si   | -0.27941800 | 0.10227300  | -0.24569700 |
| O    | -0.28559400 | -1.56588000 | -0.15597400 |
| O    | -0.97148400 | 0.74494700  | -1.61642000 |
| O    | -0.60855100 | 0.97438700  | 1.13845100  |
| C    | 0.73370300  | -2.38929400 | -0.70061400 |
| H    | 0.31486700  | -3.39709600 | -0.82491900 |
| H    | 1.07618000  | -2.03340900 | -1.68030500 |
| H    | 1.59339300  | -2.43010000 | -0.02528900 |
| C    | 0.34148500  | 1.82508400  | 1.76225700  |
| H    | -0.13961600 | 2.26075100  | 2.64846200  |
| H    | 1.22999000  | 1.26161900  | 2.06350700  |
| H    | 0.65117600  | 2.64477000  | 1.09952000  |
| C    | -2.23416600 | 1.34823600  | -1.74741100 |
| H    | -2.53209400 | 1.89042900  | -0.84068400 |
| H    | -2.18438600 | 2.06301400  | -2.58172500 |
| H    | -3.01440800 | 0.60725900  | -1.96208600 |
| C    | 2.48450500  | 0.12180100  | -0.01864100 |
| O    | 1.31324400  | 0.49811700  | -0.67183200 |
| O    | 3.54472500  | 0.38218400  | -0.61178600 |
| O    | 2.36234400  | -0.44006700 | 1.10562400  |

Sum of electronic and zero-point Energies= -1013.564610  
 Sum of electronic and thermal Energies= -1013.547222  
 Sum of electronic and thermal Enthalpies= -1013.546277  
 Sum of electronic and thermal Free Energies= -1013.611529

**TS<sub>(f)</sub>**

Charge -1

Spin multiplicity 2

| Atom | Coordinates |             |             |
|------|-------------|-------------|-------------|
| Type | X           | Y           | Z           |
| O    | 1.80610600  | 1.50083300  | 0.27146500  |
| C    | 1.58750100  | 2.69912600  | 0.90362500  |
| Si   | -0.04492300 | 0.17043200  | -0.14919600 |
| O    | -0.37792200 | 1.56245200  | -0.98240100 |
| O    | 1.16281600  | -0.71329700 | -0.94677700 |
| O    | 0.06685100  | 0.23249200  | 1.51110000  |
| C    | -1.49389800 | 1.71673100  | -1.84994700 |
| H    | -1.45344400 | 2.73676100  | -2.25238300 |
| H    | -1.45154500 | 1.01071900  | -2.68928900 |
| H    | -2.42965700 | 1.56999600  | -1.30243800 |
| C    | -0.71796300 | -0.55233900 | 2.40205600  |
| H    | -0.25377900 | -0.48259100 | 3.39390700  |
| H    | -1.74351400 | -0.17733500 | 2.44188700  |
| H    | -0.74783200 | -1.60743500 | 2.10288200  |
| C    | 2.34998600  | -1.25711900 | -0.64958900 |
| C    | -2.62338900 | -0.81543000 | -0.07141000 |
| O    | -1.28307700 | -0.92084500 | -0.48285000 |
| O    | -3.32374300 | -1.81733000 | -0.27547800 |
| O    | -2.96627700 | 0.27452300  | 0.46077400  |
| O    | 3.12199000  | -1.58760100 | -1.52595700 |
| C    | 2.64141400  | -1.48516100 | 0.82306400  |

|                                              |            |             |              |
|----------------------------------------------|------------|-------------|--------------|
| H                                            | 2.60857300 | -0.53369900 | 1.35853700   |
| H                                            | 1.87821200 | -2.13682900 | 1.26319200   |
| H                                            | 3.62409600 | -1.95051700 | 0.92334700   |
| H                                            | 1.07470800 | 2.52024700  | 1.86722800   |
| H                                            | 2.51912300 | 3.26363800  | 1.08397200   |
| H                                            | 0.88811400 | 3.31632400  | 0.31210700   |
| Sum of electronic and zero-point Energies=   |            |             | -1127.113687 |
| Sum of electronic and thermal Energies=      |            |             | -1127.094583 |
| Sum of electronic and thermal Enthalpies=    |            |             | -1127.093639 |
| Sum of electronic and thermal Free Energies= |            |             | -1127.163196 |

### 2-iodonitrobenzene

Charge 0

Spin multiplicity 1

| Atom | Coordinates |             |             |
|------|-------------|-------------|-------------|
| Type | X           | Y           | Z           |
| C    | 2.01939600  | -2.31599100 | 0.05321500  |
| C    | 0.67696600  | -1.93820000 | 0.04489600  |
| C    | 0.31014100  | -0.58682700 | 0.04424000  |
| C    | 1.33112200  | 0.37458600  | 0.03096700  |
| C    | 2.67704600  | -0.00243600 | 0.01192400  |
| C    | 3.02463000  | -1.34792300 | 0.03557400  |
| H    | 2.27383400  | -3.37184000 | 0.06573200  |
| H    | -0.09677700 | -2.69735300 | 0.03665600  |
| H    | 3.42810100  | 0.77786200  | -0.01670300 |
| H    | 4.07105300  | -1.63623500 | 0.03612400  |
| I    | -1.76006000 | -0.17255900 | -0.05266000 |
| N    | 1.07527600  | 1.82755000  | 0.04881400  |
| O    | 0.08378100  | 2.22955600  | 0.64886300  |
| O    | 1.89674800  | 2.54308200  | -0.52354100 |

|                                            |  |  |             |
|--------------------------------------------|--|--|-------------|
| Sum of electronic and zero-point Energies= |  |  | -447.419645 |
|--------------------------------------------|--|--|-------------|



Sum of electronic and thermal Energies= -447.411221  
 Sum of electronic and thermal Enthalpies= -447.410277  
 Sum of electronic and thermal Free Energies= -447.455488

**Int1**

Charge -1

Spin multiplicity 1

| Atom | Coordinates |             |             |
|------|-------------|-------------|-------------|
| Type | X           | Y           | Z           |
| Cu   | -0.66519800 | -0.41420000 | -0.00000200 |
| C    | 2.02979700  | 0.30228800  | 0.00000400  |
| O    | 1.78444600  | 1.51107200  | -0.00005600 |
| O    | 1.18379700  | -0.68085400 | 0.00008600  |
| C    | 3.49187200  | -0.18071800 | -0.00000100 |
| H    | 3.68145700  | -0.80550900 | 0.88126700  |
| H    | 3.68143100  | -0.80563500 | -0.88118700 |
| H    | 4.17876600  | 0.67011700  | -0.00007600 |
| O    | -2.48572900 | -0.37377400 | -0.00013700 |
| C    | -3.17155000 | 0.83038400  | 0.00007800  |
| H    | -2.97141900 | 1.46962000  | 0.88705400  |
| H    | -4.26919000 | 0.64985300  | -0.00014400 |
| H    | -2.97112900 | 1.47008900  | -0.88649100 |

Sum of electronic and zero-point Energies= -540.977690  
 Sum of electronic and thermal Energies= -540.967728  
 Sum of electronic and thermal Enthalpies= -540.966784  
 Sum of electronic and thermal Free Energies= -541.016456

**Int2**

Charge -1

Spin multiplicity 1

| Atom | Coordinates |   |   |
|------|-------------|---|---|
| Type | X           | Y | Z |

|                                              |             |             |             |
|----------------------------------------------|-------------|-------------|-------------|
| Cu                                           | -0.66519800 | -0.41420000 | -0.00000200 |
| C                                            | 2.02979700  | 0.30228800  | 0.00000400  |
| O                                            | 1.78444600  | 1.51107200  | -0.00005600 |
| O                                            | 1.18379700  | -0.68085400 | 0.00008600  |
| C                                            | 3.49187200  | -0.18071800 | -0.00000100 |
| H                                            | 3.68145700  | -0.80550900 | 0.88126700  |
| H                                            | 3.68143100  | -0.80563500 | -0.88118700 |
| H                                            | 4.17876600  | 0.67011700  | -0.00007600 |
| O                                            | -2.48572900 | -0.37377400 | -0.00013700 |
| C                                            | -3.17155000 | 0.83038400  | 0.00007800  |
| H                                            | -2.97141900 | 1.46962000  | 0.88705400  |
| H                                            | -4.26919000 | 0.64985300  | -0.00014400 |
| H                                            | -2.97112900 | 1.47008900  | -0.88649100 |
| Sum of electronic and zero-point Energies=   |             |             | -540.977690 |
| Sum of electronic and thermal Energies=      |             |             | -540.967728 |
| Sum of electronic and thermal Enthalpies=    |             |             | -540.966784 |
| Sum of electronic and thermal Free Energies= |             |             | -541.016456 |

### Int3

Charge 0

Spin multiplicity 1

| Atom | Coordinates |             |             |
|------|-------------|-------------|-------------|
| Type | X           | Y           | Z           |
| Cu   | -1.29739500 | -0.02721300 | -0.10379400 |
| O    | -3.00874400 | -0.51488700 | -0.20773300 |
| C    | -4.04287600 | 0.25497900  | 0.33954300  |
| H    | -3.98012700 | 0.36249600  | 1.43867900  |
| H    | -5.00864400 | -0.23496100 | 0.12493400  |
| H    | -4.10582200 | 1.27580200  | -0.08096700 |
| O    | 0.56076500  | 0.38053800  | -0.05486600 |
| C    | 1.51279700  | -0.42188200 | 0.01706000  |

|                                              |            |             |             |
|----------------------------------------------|------------|-------------|-------------|
| H                                            | 1.35019800 | -1.50501100 | 0.06397100  |
| N                                            | 2.79792200 | -0.04683900 | 0.04370200  |
| C                                            | 3.87038300 | -1.02889500 | 0.13303100  |
| H                                            | 4.53125600 | -0.95131400 | -0.73799500 |
| H                                            | 4.46386500 | -0.86316700 | 1.03952100  |
| H                                            | 3.44993300 | -2.03668400 | 0.16698300  |
| C                                            | 3.17685900 | 1.36227500  | -0.01181600 |
| H                                            | 3.81230500 | 1.54278900  | -0.88609400 |
| H                                            | 2.27440400 | 1.96780600  | -0.08345400 |
| H                                            | 3.73248300 | 1.63522100  | 0.89243000  |
| Sum of electronic and zero-point Energies=   |            |             | -560.872269 |
| Sum of electronic and thermal Energies=      |            |             | -560.860443 |
| Sum of electronic and thermal Enthalpies=    |            |             | -560.859499 |
| Sum of electronic and thermal Free Energies= |            |             | -560.912900 |

### Int1-TS<sub>OA</sub>

Charge -1

Spin multiplicity 1

| Atom | Coordinates |             |            |
|------|-------------|-------------|------------|
| Type | X           | Y           | Z          |
| Cu   | 0.22054000  | 1.69127100  | 0.15910100 |
| C    | 1.02979700  | -1.02105400 | 2.83851500 |
| C    | 0.14697100  | -0.30572000 | 2.04699900 |
| C    | 0.30533400  | -0.25862600 | 0.63759200 |
| C    | 1.37411700  | -0.99946100 | 0.08292800 |
| C    | 2.25020600  | -1.74314200 | 0.88898400 |
| C    | 2.08803900  | -1.75280000 | 2.26364200 |
| H    | 0.89422400  | -1.02040300 | 3.91821800 |
| H    | -0.67902100 | 0.24484800  | 2.48301400 |
| H    | 3.04439800  | -2.29376800 | 0.39887400 |

|                                              |             |             |             |
|----------------------------------------------|-------------|-------------|-------------|
| H                                            | 2.77033600  | -2.32082400 | 2.88995800  |
| I                                            | -1.90835700 | -1.12047500 | -0.40899400 |
| O                                            | -1.34243700 | 2.21768200  | 0.95539000  |
| N                                            | 1.58107000  | -1.03659700 | -1.35068300 |
| O                                            | 0.88012200  | -0.30945900 | -2.06145200 |
| O                                            | 2.44178400  | -1.81214200 | -1.80262300 |
| O                                            | 1.86708100  | 2.30706300  | -0.29385300 |
| C                                            | 2.86275300  | 1.88719000  | -1.15710900 |
| H                                            | 2.53981600  | 1.82393800  | -2.21041800 |
| H                                            | 3.71787500  | 2.58782800  | -1.10718800 |
| H                                            | 3.26685700  | 0.89441600  | -0.87998500 |
| C                                            | -2.44294400 | 2.58791500  | 0.18462600  |
| H                                            | -2.84191000 | 1.74354400  | -0.40289800 |
| H                                            | -3.26055800 | 2.92547400  | 0.84827500  |
| H                                            | -2.23031100 | 3.41845600  | -0.51709400 |
| Sum of electronic and zero-point Energies=   |             |             | -875.009418 |
| Sum of electronic and thermal Energies=      |             |             | -874.992104 |
| Sum of electronic and thermal Enthalpies=    |             |             | -874.991160 |
| Sum of electronic and thermal Free Energies= |             |             | -875.057678 |

### Int2-TS<sub>OA</sub>

Charge -1

Spin multiplicity 1

| Atom | Coordinates |             |             |
|------|-------------|-------------|-------------|
| Type | X           | Y           | Z           |
| Cu   | -1.03502600 | -0.65314500 | 0.46017300  |
| C    | 1.20121800  | 1.80464500  | 2.60947200  |
| C    | 0.99851100  | 0.59585000  | 1.96377300  |
| C    | 0.54288300  | 0.55744500  | 0.62489900  |
| C    | 0.31672500  | 1.79471300  | -0.02053200 |
| C    | 0.54721200  | 3.01631200  | 0.62886100  |

|   |             |             |             |
|---|-------------|-------------|-------------|
| C | 0.98968400  | 3.02723500  | 1.94092800  |
| H | 1.53499000  | 1.80463200  | 3.64531900  |
| H | 1.16413100  | -0.35239300 | 2.46319800  |
| H | 0.35732400  | 3.92899300  | 0.07644200  |
| H | 1.16389500  | 3.97125300  | 2.45000700  |
| I | 2.21901300  | -0.84645700 | -0.73890500 |
| C | -3.33826000 | -0.24526000 | -0.20742200 |
| O | -2.97651300 | -1.45236800 | -0.15160000 |
| O | -2.52516900 | 0.69132100  | 0.09620500  |
| C | -4.73610400 | 0.12809500  | -0.66142800 |
| H | -5.15338200 | 0.89730400  | -0.00383500 |
| H | -4.68043400 | 0.55251800  | -1.67071600 |
| H | -5.38663700 | -0.74947500 | -0.67764400 |
| O | -0.26975100 | -2.00190100 | 1.47338400  |
| C | -0.30231200 | -3.27437200 | 0.90116400  |
| H | -1.31180600 | -3.57881200 | 0.57262100  |
| H | 0.03381100  | -4.00960500 | 1.65623200  |
| H | 0.38603000  | -3.36511600 | 0.04186100  |
| N | -0.16659300 | 1.83182500  | -1.38520700 |
| O | -0.48595600 | 0.76503400  | -1.92126600 |
| O | -0.22399300 | 2.92958800  | -1.96151800 |

Sum of electronic and zero-point Energies= -988.387656

Sum of electronic and thermal Energies= -988.368432

Sum of electronic and thermal Enthalpies= -988.367488

Sum of electronic and thermal Free Energies= -988.439015

### Int1-M1

Charge -1

Spin multiplicity 1

| Atom | Coordinates |   |   |
|------|-------------|---|---|
| Type | X           | Y | Z |

|                                              |             |             |             |
|----------------------------------------------|-------------|-------------|-------------|
| Cu                                           | 0.62541600  | 0.69223100  | -0.20695400 |
| C                                            | -2.86717600 | -0.93005400 | -1.95492200 |
| C                                            | -1.55041700 | -0.52230000 | -1.74471900 |
| C                                            | -1.12177900 | -0.05821100 | -0.49208300 |
| C                                            | -2.07919000 | -0.03591600 | 0.52520900  |
| C                                            | -3.40460600 | -0.45019300 | 0.34371200  |
| C                                            | -3.80068100 | -0.89842100 | -0.90925100 |
| H                                            | -3.16921400 | -1.28478900 | -2.93868200 |
| H                                            | -0.83868900 | -0.57834200 | -2.56404500 |
| H                                            | -4.08983400 | -0.40948100 | 1.18209900  |
| H                                            | -4.82439500 | -1.22499900 | -1.07257800 |
| I                                            | 1.52826300  | -1.73793200 | 0.05709600  |
| C                                            | 2.49061500  | 2.58653800  | 0.61356200  |
| O                                            | 2.32655400  | 1.42984000  | -0.14315800 |
| O                                            | -0.22751700 | 2.32909500  | -0.56632200 |
| C                                            | -0.01663400 | 2.76043200  | -1.87646300 |
| H                                            | 1.05313800  | 2.85398600  | -2.13029000 |
| H                                            | -0.47787600 | 3.75844400  | -1.98468600 |
| H                                            | -0.49474200 | 2.10815000  | -2.63391600 |
| N                                            | -1.69976200 | 0.44395300  | 1.85686500  |
| O                                            | -0.52875500 | 0.78687100  | 2.04890700  |
| O                                            | -2.56668100 | 0.48073700  | 2.73685800  |
| H                                            | 3.43644300  | 3.07916900  | 0.31686500  |
| H                                            | 1.67837100  | 3.31823800  | 0.46150100  |
| H                                            | 2.56050200  | 2.38407600  | 1.70069400  |
| Sum of electronic and zero-point Energies=   |             |             | -875.047613 |
| Sum of electronic and thermal Energies=      |             |             | -875.030053 |
| Sum of electronic and thermal Enthalpies=    |             |             | -875.029108 |
| Sum of electronic and thermal Free Energies= |             |             | -875.096111 |

**Int2-M1**

Charge -1

Spin multiplicity 1

| Atom | Coordinates |             |             |
|------|-------------|-------------|-------------|
| Type | X           | Y           | Z           |
| Cu   | -0.48459100 | -0.47656400 | 0.21441200  |
| C    | 2.81965600  | -0.46100400 | -2.35906600 |
| C    | 1.51626600  | -0.44989800 | -1.86117000 |
| C    | 1.27777100  | -0.33975300 | -0.48595400 |
| C    | 2.38701800  | -0.24501300 | 0.35612700  |
| C    | 3.70089300  | -0.24930500 | -0.12563600 |
| C    | 3.91685900  | -0.35800900 | -1.49365200 |
| H    | 2.98138900  | -0.54270400 | -3.43195600 |
| H    | 0.67522100  | -0.51179900 | -2.54558800 |
| H    | 4.51806100  | -0.17007600 | 0.58132400  |
| H    | 4.93050200  | -0.36067500 | -1.88535600 |
| I    | -0.73048700 | 2.07132200  | -0.22898700 |
| C    | -3.10140700 | -1.02351300 | -0.06063500 |
| O    | -2.80484700 | -1.21732700 | -1.24724200 |
| O    | -2.27887600 | -0.66820800 | 0.87410700  |
| C    | -4.54312400 | -1.19125900 | 0.42474200  |
| H    | -4.58126100 | -1.91913600 | 1.24309700  |
| H    | -4.91159600 | -0.23806600 | 0.82058600  |
| H    | -5.18510000 | -1.52146900 | -0.39578600 |
| O    | -0.00485900 | -2.27195200 | 0.46690000  |
| C    | -0.21144800 | -3.14245300 | -0.60817500 |
| H    | -1.23264300 | -3.09517000 | -1.01071000 |
| H    | -0.03106600 | -4.16589900 | -0.23342000 |
| H    | 0.49720400  | -2.97931600 | -1.44278000 |
| N    | 2.19301200  | -0.13808000 | 1.80404700  |

|                                              |            |             |             |
|----------------------------------------------|------------|-------------|-------------|
| O                                            | 1.04060800 | -0.07930500 | 2.23932400  |
| O                                            | 3.19575400 | -0.10415900 | 2.52580200  |
| Sum of electronic and zero-point Energies=   |            |             | -988.420224 |
| Sum of electronic and thermal Energies=      |            |             | -988.400676 |
| Sum of electronic and thermal Enthalpies=    |            |             | -988.399731 |
| Sum of electronic and thermal Free Energies= |            |             | -988.472381 |

**Int1-TS<sub>RE</sub>**

Charge -1

Spin multiplicity 1

| Atom | Coordinates |             |             |
|------|-------------|-------------|-------------|
| Type | X           | Y           | Z           |
| Cu   | 0.57149000  | 0.77621500  | -0.02842600 |
| C    | -2.72962100 | -0.95647900 | -2.01666800 |
| C    | -1.54296700 | -0.27786900 | -1.79504900 |
| C    | -1.21870000 | 0.21054700  | -0.50336700 |
| C    | -2.12862100 | -0.09224400 | 0.53956600  |
| C    | -3.33720900 | -0.76173200 | 0.30511700  |
| C    | -3.65121500 | -1.18769200 | -0.97469700 |
| H    | -2.94321700 | -1.33247800 | -3.01576400 |
| H    | -0.83605900 | -0.14773700 | -2.60811000 |
| H    | -3.99016500 | -0.94619900 | 1.15061000  |
| H    | -4.58067200 | -1.71597900 | -1.16630600 |
| I    | 1.66473700  | -1.53393600 | -0.04713600 |
| C    | 3.29510100  | 1.78147000  | 0.32097700  |
| O    | 1.96297100  | 2.01928600  | 0.02093800  |
| O    | -0.87549400 | 2.02230000  | -0.47146700 |
| C    | -0.63412600 | 2.67060700  | -1.70487100 |
| H    | 0.43862400  | 2.82222500  | -1.87611100 |
| H    | -1.12641200 | 3.65162500  | -1.64597000 |



|                                              |             |            |             |
|----------------------------------------------|-------------|------------|-------------|
| H                                            | -1.07679300 | 2.12003200 | -2.55092000 |
| N                                            | -1.79125700 | 0.26641700 | 1.88906000  |
| O                                            | -0.65675500 | 0.73319300 | 2.10656000  |
| O                                            | -2.62780700 | 0.09571700 | 2.78749800  |
| H                                            | 3.86296000  | 2.73324800 | 0.27747000  |
| H                                            | 3.45176900  | 1.37204300 | 1.33835900  |
| H                                            | 3.79532600  | 1.08305900 | -0.37837600 |
| Sum of electronic and zero-point Energies=   |             |            | -875.034411 |
| Sum of electronic and thermal Energies=      |             |            | -875.017383 |
| Sum of electronic and thermal Enthalpies=    |             |            | -875.016438 |
| Sum of electronic and thermal Free Energies= |             |            | -875.082106 |

### Int2-TS<sub>RE</sub>

Charge -1

Spin multiplicity 1

| Atom | Coordinates |             |             |
|------|-------------|-------------|-------------|
| Type | X           | Y           | Z           |
| Cu   | -0.53125400 | -0.39770700 | 0.24309600  |
| C    | 2.79078700  | -0.49967800 | -2.29868400 |
| C    | 1.50234600  | -0.67333900 | -1.81111400 |
| C    | 1.25171400  | -0.60829000 | -0.42513900 |
| C    | 2.34468300  | -0.34876600 | 0.42668900  |
| C    | 3.64451400  | -0.19036200 | -0.06746000 |
| C    | 3.87499500  | -0.26937700 | -1.43272400 |
| H    | 2.95630400  | -0.53131600 | -3.37370600 |
| H    | 0.67416500  | -0.82384000 | -2.49596500 |
| H    | 4.44031300  | 0.00694100  | 0.64142300  |
| H    | 4.87849600  | -0.13921100 | -1.82716200 |
| I    | -0.68764300 | 2.11972400  | -0.28172200 |
| C    | -3.13045800 | -1.10780100 | 0.00863800  |
| O    | -2.80783500 | -1.37003200 | -1.16239000 |

|   |             |             |             |
|---|-------------|-------------|-------------|
| O | -2.33105300 | -0.69131200 | 0.93253300  |
| C | -4.58778700 | -1.24743500 | 0.45569200  |
| H | -5.17835600 | -1.76036500 | -0.30795700 |
| H | -4.64591700 | -1.79083600 | 1.40504300  |
| H | -5.00836600 | -0.24922300 | 0.62672000  |
| O | 0.30081000  | -2.14587400 | 0.24266400  |
| C | -0.07593800 | -3.05205400 | -0.77810600 |
| H | -1.07184300 | -2.83690000 | -1.17846600 |
| H | -0.07638300 | -4.04804000 | -0.31118000 |
| H | 0.65908900  | -3.06348300 | -1.59994200 |
| N | 2.12150700  | -0.21120500 | 1.84599200  |
| O | 0.95031400  | -0.22887700 | 2.25702300  |
| O | 3.09829400  | -0.07822600 | 2.59441800  |

Sum of electronic and zero-point Energies= -988.412544

Sum of electronic and thermal Energies= -988.393728

Sum of electronic and thermal Enthalpies= -988.392784

Sum of electronic and thermal Free Energies= -988.463194

### Int1-M2

Charge -1

Spin multiplicity 1

| Atom | Coordinates |             |             |
|------|-------------|-------------|-------------|
| Type | X           | Y           | Z           |
| Cu   | 0.00000000  | 0.93522800  | 0.00000000  |
| I    | 0.26095900  | -1.52567600 | 0.00000000  |
| C    | -1.31981700 | 3.43478100  | 0.00000000  |
| O    | -0.10518700 | 2.76810600  | 0.00000000  |
| H    | -1.15818700 | 4.53485200  | 0.00000000  |
| H    | -1.95611800 | 3.22542800  | -0.88748700 |
| H    | -1.95611800 | 3.22542800  | 0.88748700  |

Sum of electronic and zero-point Energies= -323.980649

Sum of electronic and thermal Energies= -323.974221  
 Sum of electronic and thermal Enthalpies= -323.973277  
 Sum of electronic and thermal Free Energies= -324.013604

### Int2-M2

Charge -1

Spin multiplicity 1

| Atom | Coordinates |             |             |
|------|-------------|-------------|-------------|
| Type | X           | Y           | Z           |
| Cu   | -0.35147200 | -0.24480500 | 0.00004600  |
| I    | 2.08842000  | 0.06363100  | 0.00003200  |
| C    | -3.07371400 | 0.22199800  | -0.00007700 |
| O    | -2.87365100 | 1.43832600  | -0.00019000 |
| O    | -2.17773600 | -0.71942100 | -0.00072300 |
| C    | -4.51058500 | -0.32356900 | 0.00049600  |
| H    | -4.67209200 | -0.95560900 | -0.88076900 |
| H    | -4.67139400 | -0.95595000 | 0.88163300  |
| H    | -5.23319300 | 0.49664600  | 0.00088200  |

Sum of electronic and zero-point Energies= -437.359643  
 Sum of electronic and thermal Energies= -437.351371  
 Sum of electronic and thermal Enthalpies= -437.350426  
 Sum of electronic and thermal Free Energies= -437.396555

### Int1-TSSig

Charge -1

Spin multiplicity 1

| Atom | Coordinates |            |             |
|------|-------------|------------|-------------|
| Type | X           | Y          | Z           |
| Cu   | 2.23286900  | 0.50050200 | -0.65203300 |
| C    | -3.02042500 | 1.53851400 | 0.49025200  |
| C    | -2.20303800 | 0.53082000 | -0.06696500 |

|                                              |             |             |             |
|----------------------------------------------|-------------|-------------|-------------|
| C                                            | -0.87830800 | 0.30106100  | 0.40825700  |
| C                                            | -0.47464400 | 1.10099500  | 1.52741700  |
| C                                            | -1.27831800 | 2.09233100  | 2.04136200  |
| C                                            | -2.57558300 | 2.32690200  | 1.52818600  |
| H                                            | -4.00808800 | 1.65963100  | 0.06212100  |
| H                                            | 0.50732700  | 0.91717800  | 1.94949000  |
| H                                            | -0.90756500 | 2.68755400  | 2.87384100  |
| H                                            | -3.20968500 | 3.10261400  | 1.94713900  |
| I                                            | -0.10755100 | -1.78188700 | 0.56426500  |
| C                                            | 4.73681000  | 0.74063600  | 0.58847100  |
| O                                            | 4.02076600  | 0.24664000  | -0.49378900 |
| O                                            | 0.39087500  | 0.76906100  | -0.96521200 |
| C                                            | 0.03005500  | 2.01314800  | -1.52270000 |
| H                                            | -1.01573900 | 1.99082800  | -1.86214200 |
| H                                            | 0.66187000  | 2.21438800  | -2.39779000 |
| H                                            | 0.14417000  | 2.84604800  | -0.80957200 |
| N                                            | -2.76726200 | -0.22755200 | -1.15806300 |
| O                                            | -2.03187700 | -0.98210500 | -1.80271700 |
| O                                            | -3.97990300 | -0.08629200 | -1.40889600 |
| H                                            | 4.41111300  | 0.33438200  | 1.56912200  |
| H                                            | 5.80938100  | 0.47371900  | 0.48988200  |
| H                                            | 4.70682200  | 1.84708800  | 0.68650400  |
| Sum of electronic and zero-point Energies=   |             |             | -875.015259 |
| Sum of electronic and thermal Energies=      |             |             | -874.997707 |
| Sum of electronic and thermal Enthalpies=    |             |             | -874.996763 |
| Sum of electronic and thermal Free Energies= |             |             | -875.065690 |

### Int2-TSSig

Charge -1

Spin multiplicity 1

Atom Coordinates

| Type                                       | X           | Y           | Z           |
|--------------------------------------------|-------------|-------------|-------------|
| Cu                                         | -1.85125800 | 0.25040000  | 0.34115000  |
| C                                          | 3.47805700  | 1.57802600  | -0.30577100 |
| C                                          | 2.59649600  | 0.60705700  | 0.21600100  |
| C                                          | 1.37893200  | 0.28024900  | -0.44758600 |
| C                                          | 1.15134600  | 0.94295700  | -1.69561000 |
| C                                          | 2.01438100  | 1.90119400  | -2.17738600 |
| C                                          | 3.20218000  | 2.23270900  | -1.48649400 |
| H                                          | 4.37627300  | 1.78143700  | 0.26445800  |
| H                                          | 0.25517000  | 0.68382500  | -2.24870300 |
| H                                          | 1.77822900  | 2.39247700  | -3.11939200 |
| H                                          | 3.88541400  | 2.98015800  | -1.87846900 |
| I                                          | 0.66213300  | -1.82760500 | -0.49331000 |
| C                                          | -4.53951900 | 0.52368900  | 0.10485800  |
| O                                          | -4.41079500 | 1.73582600  | 0.29457700  |
| O                                          | -3.58888100 | -0.36405400 | 0.07269400  |
| C                                          | -5.92986300 | -0.08305600 | -0.12202700 |
| H                                          | -5.95714500 | -0.60986700 | -1.08292100 |
| H                                          | -6.14431700 | -0.82486100 | 0.65627500  |
| H                                          | -6.69629200 | 0.69578300  | -0.10677000 |
| O                                          | -0.10063100 | 0.85223600  | 0.66181800  |
| C                                          | 0.05132500  | 2.21833000  | 0.98332800  |
| H                                          | 1.06083500  | 2.40189700  | 1.38046100  |
| H                                          | -0.67314400 | 2.49160200  | 1.76123800  |
| H                                          | -0.10636800 | 2.87769700  | 0.11532400  |
| N                                          | 2.98045400  | -0.01190800 | 1.46455600  |
| O                                          | 2.17403000  | -0.74989700 | 2.03820500  |
| O                                          | 4.11772900  | 0.22685600  | 1.91305600  |
| Sum of electronic and zero-point Energies= |             |             | -988.393968 |
| Sum of electronic and thermal Energies=    |             |             | -988.374576 |

Sum of electronic and thermal Enthalpies= -988.373632

Sum of electronic and thermal Free Energies= -988.447787

### **P (2-nitroanisoIe)**

Charge 0

Spin multiplicity 1

| Atom | Coordinates |             |             |
|------|-------------|-------------|-------------|
| Type | X           | Y           | Z           |
| C    | 1.61404500  | 1.99582300  | -0.05944000 |
| C    | 1.80518700  | 0.61596000  | -0.01912200 |
| C    | 0.71040300  | -0.26359500 | 0.00104400  |
| C    | -0.58533900 | 0.30596000  | -0.01488500 |
| C    | -0.76617700 | 1.68845800  | -0.03238700 |
| C    | 0.33043200  | 2.54252100  | -0.06429300 |
| H    | 2.48378800  | 2.64671300  | -0.08167400 |
| H    | 2.81322900  | 0.22026000  | -0.00139300 |
| H    | -1.78108100 | 2.06719900  | -0.02338000 |
| H    | 0.18404500  | 3.61726400  | -0.09229200 |
| O    | 0.82851600  | -1.60469000 | 0.07352200  |
| C    | 2.12843300  | -2.17832500 | 0.15080800  |
| H    | 1.96480600  | -3.25456200 | 0.21516500  |
| H    | 2.66691600  | -1.83487400 | 1.04286300  |
| H    | 2.71941900  | -1.95256000 | -0.74531000 |
| N    | -1.79907300 | -0.52049300 | -0.02190400 |
| O    | -1.74178700 | -1.64388900 | -0.51446200 |
| O    | -2.82166900 | -0.01477100 | 0.44956500  |

Sum of electronic and zero-point Energies= -551.127132

Sum of electronic and thermal Energies= -551.117754

Sum of electronic and thermal Enthalpies= -551.116810

Sum of electronic and thermal Free Energies= -551.162481

### **Int1-DMF**

Charge -1

Spin multiplicity 1

| Atom | Coordinates |             |             |
|------|-------------|-------------|-------------|
| Type | X           | Y           | Z           |
| Cu   | 1.94897000  | 0.19772200  | -0.16036100 |
| O    | 3.54148500  | -0.42524600 | -0.78925100 |
| O    | 0.28795600  | 0.81389600  | 0.35702900  |
| C    | 0.19039400  | 1.89376200  | 1.22987000  |
| H    | 0.65923700  | 1.71490300  | 2.21951200  |
| H    | -0.87612200 | 2.13119000  | 1.43160300  |
| H    | 0.64249200  | 2.82670100  | 0.83821100  |
| C    | 4.37631400  | -1.20946600 | -0.01169400 |
| H    | 5.29013800  | -1.48676400 | -0.58160500 |
| H    | 4.74055800  | -0.71221100 | 0.91441300  |
| H    | 3.92583800  | -2.17163300 | 0.31839700  |
| O    | -3.71418100 | 1.02959500  | -1.36076900 |
| C    | -2.86528200 | 0.48147100  | -0.66088300 |
| H    | -1.81462300 | 0.81455500  | -0.58991000 |
| N    | -3.10541100 | -0.61697500 | 0.12176400  |
| C    | -2.05416600 | -1.21926500 | 0.92545100  |
| H    | -2.35157500 | -1.24554800 | 1.98506100  |
| H    | -1.86456700 | -2.25459100 | 0.60403600  |
| H    | -1.13128300 | -0.62992200 | 0.82041900  |
| C    | -4.42022800 | -1.21846100 | 0.14191100  |
| H    | -4.84093700 | -1.21449500 | 1.15870500  |
| H    | -5.06412900 | -0.63871400 | -0.52219000 |
| H    | -4.38155300 | -2.26278400 | -0.20252500 |

Sum of electronic and zero-point Energies= -809.276002

Sum of electronic and thermal Energies= -809.256695

Sum of electronic and thermal Enthalpies= -809.255750

Sum of electronic and thermal Free Energies= -809.326616

**Int1-TS<sub>OA</sub>-DMF**

Charge -1

Spin multiplicity 1

| Atom | Coordinates |             |             |
|------|-------------|-------------|-------------|
| Type | X           | Y           | Z           |
| Cu   | -0.44358700 | -0.13419600 | -0.45513000 |
| C    | 1.13827800  | 1.23693500  | 2.89371400  |
| C    | 0.81703700  | 0.24655800  | 1.97840300  |
| C    | 1.15241400  | 0.38712200  | 0.60868200  |
| C    | 1.84421600  | 1.55714400  | 0.22960500  |
| C    | 2.19681800  | 2.54173500  | 1.16435100  |
| C    | 1.84036200  | 2.39024700  | 2.49405900  |
| H    | 0.85339500  | 1.10889500  | 3.93587900  |
| H    | 0.30477600  | -0.65573500 | 2.29317400  |
| H    | 2.74192200  | 3.40811100  | 0.80883800  |
| H    | 2.10391900  | 3.15431500  | 3.21988100  |
| I    | 2.69641000  | -1.66078900 | -0.00179100 |
| O    | -1.04850100 | -1.77335000 | 0.10590900  |
| N    | 2.24509400  | 1.75856100  | -1.15093200 |
| O    | 1.84557700  | 0.95338900  | -1.99749700 |
| O    | 2.97774400  | 2.72509300  | -1.41557900 |
| O    | -1.24091800 | 1.39087600  | -1.07625200 |
| C    | -0.78671500 | 2.55959200  | -1.66301500 |
| H    | -0.36994800 | 2.40946900  | -2.67295800 |
| H    | -1.61860900 | 3.28417100  | -1.74342300 |
| H    | -0.00646900 | 3.05698400  | -1.05639800 |
| C    | -0.84819800 | -2.95692000 | -0.60424800 |
| H    | 0.22262400  | -3.20340300 | -0.69139300 |
| H    | -1.32973300 | -3.79711600 | -0.07227000 |



|   |             |             |             |
|---|-------------|-------------|-------------|
| H | -1.27018000 | -2.92718900 | -1.62689200 |
| O | -7.00306000 | -0.83506300 | -0.22056800 |
| C | -6.25925800 | 0.13764200  | -0.16137500 |
| H | -6.56800200 | 1.13546500  | -0.53679500 |
| N | -4.99786200 | 0.16189700  | 0.33800100  |
| C | -4.22933500 | 1.39548600  | 0.41867300  |
| H | -4.03371500 | 1.65734700  | 1.46920200  |
| H | -3.26772800 | 1.31078600  | -0.10314800 |
| H | -4.80671400 | 2.20845400  | -0.03435300 |
| C | -4.40072200 | -1.04647800 | 0.89255800  |
| H | -4.30399000 | -0.95847000 | 1.98472700  |
| H | -5.06120200 | -1.88312700 | 0.66040200  |
| H | -3.40284100 | -1.22062500 | 0.47320600  |

Sum of electronic and zero-point Energies= -1123.426117

Sum of electronic and thermal Energies= -1123.400568

Sum of electronic and thermal Enthalpies= -1123.399624

Sum of electronic and thermal Free Energies= -1123.489578

### Int1-TSSig-DMF

Charge -1

Spin multiplicity 1

| Atom | Coordinates |             |             |
|------|-------------|-------------|-------------|
| Type | X           | Y           | Z           |
| Cu   | -0.63998500 | 1.45398600  | 0.45179000  |
| C    | 4.65239800  | 0.30450400  | -0.52235100 |
| C    | 3.48547600  | -0.19906900 | 0.09241400  |
| C    | 2.19235800  | 0.04812200  | -0.45436700 |
| C    | 2.16917900  | 0.77597400  | -1.68858200 |
| C    | 3.31697400  | 1.27591700  | -2.26009600 |
| C    | 4.58688400  | 1.04340100  | -1.68308700 |
| H    | 5.59531400  | 0.08231800  | -0.03765900 |

|   |             |             |             |
|---|-------------|-------------|-------------|
| H | 1.20616000  | 0.93986300  | -2.15986500 |
| H | 3.23649700  | 1.84162900  | -3.18643800 |
| H | 5.48971700  | 1.42918600  | -2.14687000 |
| I | 0.65342300  | -1.57132500 | -0.42773100 |
| C | -2.97226800 | 2.97710400  | 0.03216100  |
| O | -2.43440400 | 1.70560700  | 0.23486100  |
| O | 1.19283700  | 1.14286900  | 0.75659800  |
| C | 1.97452400  | 2.25097400  | 1.14691900  |
| H | 2.96013000  | 1.91431900  | 1.49918200  |
| H | 1.47930200  | 2.76730600  | 1.97965400  |
| H | 2.12813400  | 2.97134200  | 0.32721000  |
| N | 3.66948300  | -0.95107800 | 1.31186200  |
| O | 2.67545900  | -1.26241400 | 1.97551200  |
| O | 4.83038600  | -1.25271100 | 1.64767400  |
| H | -2.58319100 | 3.48723700  | -0.87092900 |
| H | -4.06970400 | 2.90496200  | -0.09976600 |
| H | -2.80520400 | 3.67189800  | 0.87923000  |
| O | -7.30089000 | -0.94161000 | -0.82370200 |
| C | -6.57874400 | -0.80864100 | 0.15967900  |
| H | -6.98848900 | -0.80749000 | 1.19185800  |
| N | -5.23621000 | -0.63433200 | 0.15722000  |
| C | -4.46192900 | -0.53998800 | 1.38834100  |
| H | -3.87558000 | -1.45611600 | 1.55395300  |
| H | -3.76874400 | 0.30705500  | 1.31639000  |
| H | -5.14135500 | -0.40560200 | 2.23685800  |
| C | -4.49139100 | -0.59496800 | -1.09599400 |
| H | -5.19888000 | -0.42678000 | -1.90959300 |
| H | -3.74630700 | 0.20575700  | -1.03815900 |
| H | -3.97044600 | -1.54827000 | -1.26854500 |

Sum of electronic and zero-point Energies= -1123.434045

Sum of electronic and thermal Energies= -1123.408554  
Sum of electronic and thermal Enthalpies= -1123.407610  
Sum of electronic and thermal Free Energies= -1123.498315

### Int1-TS<sub>OA</sub>-PhI

Charge -1

Spin multiplicity 1

| Atom | Coordinates |             |             |
|------|-------------|-------------|-------------|
| Type | X           | Y           | Z           |
| Cu   | -0.50594300 | 1.40821000  | -0.01680000 |
| C    | 2.97890100  | 0.14593200  | 1.42369400  |
| C    | 1.59261100  | 0.00748000  | 1.34612000  |
| C    | 0.98244600  | -0.08051700 | 0.08304100  |
| C    | 1.76753200  | -0.10865400 | -1.08154800 |
| C    | 3.15105500  | 0.03913300  | -0.98003000 |
| C    | 3.76825900  | 0.16084100  | 0.26898500  |
| H    | 3.44292100  | 0.24454700  | 2.40366000  |
| H    | 0.96958400  | 0.04061700  | 2.23080000  |
| H    | 3.74875600  | 0.04663200  | -1.88981900 |
| H    | 4.84896700  | 0.25979400  | 0.34128400  |
| I    | -0.80725800 | -1.78987000 | -0.03603200 |
| O    | -0.80652000 | 1.53754600  | 1.82246400  |
| O    | -0.60141900 | 2.00381300  | -1.75911700 |
| C    | -1.13298600 | 1.25848500  | -2.79617600 |
| H    | -2.18269500 | 0.94045400  | -2.63383000 |
| H    | -1.11893700 | 1.84056400  | -3.74007700 |
| H    | -0.56221300 | 0.32686800  | -3.00449600 |
| C    | -2.13044200 | 1.52051200  | 2.24522300  |
| H    | -2.63749000 | 0.55084100  | 2.06323700  |
| H    | -2.18533400 | 1.69751000  | 3.33908000  |
| H    | -2.76485400 | 2.30384800  | 1.77689800  |

H 1.29757100 -0.21681000 -2.05245800  
 Sum of electronic and zero-point Energies= -670.514578  
 Sum of electronic and thermal Energies= -670.499267  
 Sum of electronic and thermal Enthalpies= -670.498323  
 Sum of electronic and thermal Free Energies= -670.560705

**Int1-M1-PhI**

Charge -1

Spin multiplicity 1

| Atom | Coordinates |             |             |
|------|-------------|-------------|-------------|
| Type | X           | Y           | Z           |
| Cu   | 0.32211700  | -0.43278900 | -0.46691800 |
| C    | -3.24944600 | -0.73828700 | 1.61410500  |
| C    | -1.89553600 | -0.69416200 | 1.25406400  |
| C    | -1.54388600 | -0.35018400 | -0.05099200 |
| C    | -2.52471700 | -0.06039800 | -0.99823200 |
| C    | -3.87244700 | -0.10330800 | -0.63011200 |
| C    | -4.23948600 | -0.44207400 | 0.67629700  |
| H    | -3.52279000 | -1.00170000 | 2.63449900  |
| H    | -1.12583100 | -0.91800600 | 1.98828600  |
| H    | -4.63778300 | 0.12606200  | -1.36975100 |
| H    | -5.28980100 | -0.47405300 | 0.95873500  |
| I    | 0.50697900  | 2.10348800  | 0.00853200  |
| C    | 2.64154500  | -1.16677800 | 0.47476500  |
| O    | 1.87502500  | -1.42901600 | 1.42042500  |
| O    | 2.26703900  | -0.66845600 | -0.65296800 |
| C    | 4.14545900  | -1.41090500 | 0.60254000  |
| H    | 4.51298300  | -1.97900100 | -0.25909400 |
| H    | 4.66943000  | -0.44772300 | 0.60520800  |
| H    | 4.37054600  | -1.94737300 | 1.52795300  |
| O    | -0.12582700 | -2.02877200 | -1.31908600 |

|                                              |             |             |             |
|----------------------------------------------|-------------|-------------|-------------|
| C                                            | -0.19484100 | -3.18286400 | -0.53620100 |
| H                                            | 0.71565000  | -3.36195100 | 0.05627400  |
| H                                            | -0.33272100 | -4.03994800 | -1.21981600 |
| H                                            | -1.05538000 | -3.18141300 | 0.15799100  |
| H                                            | -2.24535000 | 0.19482500  | -2.01622700 |
| Sum of electronic and zero-point Energies=   |             |             | -783.916509 |
| Sum of electronic and thermal Energies=      |             |             | -783.899221 |
| Sum of electronic and thermal Enthalpies=    |             |             | -783.898277 |
| Sum of electronic and thermal Free Energies= |             |             | -783.966011 |

### Int1-TS<sub>RE</sub>-PhI

Charge -2

Spin multiplicity 1

| Atom | Coordinates |             |             |
|------|-------------|-------------|-------------|
| Type | X           | Y           | Z           |
| Cu   | 0.35919900  | 0.79826100  | 0.20978600  |
| C    | -3.22400800 | -0.47523700 | -1.42995200 |
| C    | -2.09070300 | 0.29543100  | -1.14081200 |
| C    | -1.52036900 | 0.22843200  | 0.13752200  |
| C    | -2.11496600 | -0.56069600 | 1.13531100  |
| C    | -3.24185900 | -1.31582400 | 0.83086300  |
| C    | -3.80821500 | -1.28021600 | -0.45312800 |
| H    | -3.64416500 | -0.44157400 | -2.43399600 |
| H    | -1.63747100 | 0.90502000  | -1.91789100 |
| H    | -3.68449400 | -1.94357000 | 1.60252800  |
| H    | -4.69045500 | -1.87334300 | -0.68164100 |
| I    | 1.51760100  | -1.49153800 | -0.00786600 |
| C    | 2.92306400  | 1.97060800  | -0.61384100 |
| O    | 1.65212700  | 2.14917900  | -0.09498700 |
| O    | -1.05557900 | 1.90949400  | 0.92293900  |
| C    | -1.28319900 | 3.05133000  | 0.12215100  |

|                                              |             |             |             |
|----------------------------------------------|-------------|-------------|-------------|
| H                                            | -0.37153700 | 3.37362100  | -0.39544600 |
| H                                            | -1.61236500 | 3.85253700  | 0.80055600  |
| H                                            | -2.09094300 | 2.87310500  | -0.60887100 |
| H                                            | 3.43021400  | 2.95015300  | -0.74907400 |
| H                                            | 3.58452600  | 1.36782500  | 0.03953500  |
| H                                            | 2.93889700  | 1.47239600  | -1.60564500 |
| H                                            | -1.68269100 | -0.58657200 | 2.13077800  |
| Sum of electronic and zero-point Energies=   |             |             | -670.527020 |
| Sum of electronic and thermal Energies=      |             |             | -670.512366 |
| Sum of electronic and thermal Enthalpies=    |             |             | -670.511422 |
| Sum of electronic and thermal Free Energies= |             |             | -670.571677 |

### Int1-TSSig-PhI

Charge -1

Spin multiplicity 1

| Atom | Coordinates |             |             |
|------|-------------|-------------|-------------|
| Type | X           | Y           | Z           |
| Cu   | -1.77876800 | -1.05482200 | -0.08038600 |
| C    | 3.73251800  | -0.51958500 | -0.65613500 |
| C    | 2.45558800  | -0.06021600 | -0.98306800 |
| C    | 1.43108500  | -0.09982600 | -0.01881500 |
| C    | 1.71548700  | -0.58561900 | 1.27197800  |
| C    | 2.99718000  | -1.04354000 | 1.57081300  |
| C    | 4.02298300  | -1.01622400 | 0.61799300  |
| H    | 4.51295800  | -0.47485600 | -1.41501000 |
| H    | 0.93237700  | -0.60291500 | 2.02297500  |
| H    | 3.19468600  | -1.42197100 | 2.57298300  |
| H    | 5.02194700  | -1.36626000 | 0.86530000  |
| I    | 0.01565100  | 1.79971700  | -0.06026400 |
| O    | -3.47906600 | -1.14789500 | 0.55098600  |
| O    | -0.01224100 | -1.14737700 | -0.74844700 |

|                                              |             |             |             |
|----------------------------------------------|-------------|-------------|-------------|
| C                                            | 0.48216700  | -2.44907500 | -0.98139200 |
| H                                            | 1.47122800  | -2.39307000 | -1.46099700 |
| H                                            | -0.19725000 | -2.98325900 | -1.66014700 |
| H                                            | 0.58419200  | -3.03872900 | -0.05616200 |
| H                                            | 2.24713900  | 0.33433200  | -1.97205400 |
| C                                            | -4.36068700 | -0.08794000 | 0.37882600  |
| H                                            | -3.99757800 | 0.87353800  | 0.79664300  |
| H                                            | -4.62079900 | 0.11520800  | -0.68210900 |
| H                                            | -5.32159900 | -0.30285300 | 0.89222800  |
| Sum of electronic and zero-point Energies=   |             |             | -670.512127 |
| Sum of electronic and thermal Energies=      |             |             | -670.497092 |
| Sum of electronic and thermal Enthalpies=    |             |             | -670.496148 |
| Sum of electronic and thermal Free Energies= |             |             | -670.558838 |

### 9-O<sub>2</sub>-singlet

Charge -1

Spin multiplicity 1

| Atom | Coordinates |             |             |
|------|-------------|-------------|-------------|
| Type | X           | Y           | Z           |
| Cu   | 0.55645200  | -0.24623700 | -0.18502900 |
| C    | 2.31139600  | 1.85416600  | 0.25203700  |
| O    | 1.07258700  | 1.51694400  | -0.28851100 |
| H    | 2.50074900  | 2.92955500  | 0.06716600  |
| H    | 2.37217300  | 1.70834000  | 1.34830200  |
| H    | 3.15993600  | 1.30054100  | -0.19408300 |
| O    | 0.89369600  | -2.06627900 | 0.00798300  |
| O    | 2.00219700  | -1.26487600 | 0.22981600  |
| C    | -2.08738900 | 0.11258900  | 0.19276600  |
| O    | -1.83672000 | 0.04491300  | 1.39770700  |
| O    | -1.23768400 | -0.02388500 | -0.78068400 |
| C    | -3.51475500 | 0.39171500  | -0.29566500 |

|                                              |             |             |             |
|----------------------------------------------|-------------|-------------|-------------|
| H                                            | -3.54493300 | 1.36133900  | -0.80660300 |
| H                                            | -3.82396400 | -0.36763600 | -1.02266900 |
| H                                            | -4.20917700 | 0.40336500  | 0.54840900  |
| Sum of electronic and zero-point Energies=   |             |             | -691.286979 |
| Sum of electronic and thermal Energies=      |             |             | -691.274827 |
| Sum of electronic and thermal Enthalpies=    |             |             | -691.273883 |
| Sum of electronic and thermal Free Energies= |             |             | -691.327434 |

### 9-O<sub>2</sub>-triplet

Charge -1

Spin multiplicity 3

| Atom | Coordinates |             |             |
|------|-------------|-------------|-------------|
| Type | X           | Y           | Z           |
| Cu   | 0.50039200  | 0.12724600  | -0.21368600 |
| C    | 2.60773800  | -1.64663400 | 0.37531000  |
| O    | 1.38428300  | -1.52333100 | -0.26592700 |
| H    | 3.07051400  | -2.62425900 | 0.12650900  |
| H    | 3.35244700  | -0.87409600 | 0.08897100  |
| H    | 2.53902500  | -1.61580600 | 1.48433300  |
| O    | 0.75414300  | 2.22716700  | -0.13801500 |
| O    | 1.81358500  | 1.53742500  | 0.24560700  |
| C    | -2.11351700 | -0.16593700 | 0.17894600  |
| O    | -1.32166700 | -0.23351200 | -0.84008000 |
| O    | -1.77872300 | 0.12618400  | 1.33608500  |
| C    | -3.57625700 | -0.50015100 | -0.13960100 |
| H    | -3.65252100 | -1.54736600 | -0.45602200 |
| H    | -4.20889800 | -0.33911500 | 0.73732400  |
| H    | -3.93268900 | 0.11536000  | -0.97350600 |

Sum of electronic and zero-point Energies= -691.296913

Sum of electronic and thermal Energies= -691.283684



Sum of electronic and thermal Enthalpies= -691.282740

Sum of electronic and thermal Free Energies= -691.340823
